# Supplementary material
Source: publisher site journal article supplement (https://www.dovepress.com/get_supplementary_file.php?f=274431.xlsx)
Supplement: Supplementary file 1 [file get_supplementary_file.php]

## Sheet: Supplementary Table 1
Primer sequences of the six SNPs under investigation
SNP ID	Forward primer 5´….. 3´	Reverse primer 5´….. 3´	Extension primer 5´….. 3´
rs1434536	ACGTTGGATGTCTCTGTCTTTGCCCAGGTC	ACGTTGGATGACAAGCCTTGAACATCGTCC	CCCTCCCAGGTCGCTCCCTGA
rs334348	ACGTTGGATGATGTGCTTAAGCCACTAAAG	ACGTTGGATGGCTTGATGTGAGAATATTCA	CGAAGTGGCATTAATTAGTAAATT
rs1042538	ACGTTGGATGCTAGGATTTATCTGCAGTGT	ACGTTGGATGCACGTGTAACATAGGTTGGC	GCTTGTTTTGTTTTTGTTTTAGACAATT
rs61764370	ACGTTGGATGGTGTGCCACTACACTCAACT	ACGTTGGATGACAGGTTTATGAGGCCAAGG	CGACCTCCTGACCTCAAGTGAT
rs16917496	ACGTTGGATGATACCTGTTTGTGGTTTAGC	ACGTTGGATGGGCCTTGCCTGGCAATAAAT	AATAATTTTCAAGTTTATTTCCTT
rs1044129	ACGTTGGATGAGTGGAGCTGCTCTGTTTAG	ACGTTGGATGACCCTGGAGGTATTGGTACG	GGGGTAGGTGAATCTCCTCAAATACA

## Sheet: Supplementary Table 2
Phenotype and genotype data of the study participants
Status	ER status	rs1434536	rs334348	rs1042538	rs61764370	rs16917496	rs1044129
Case	.	AA	AA	TT	TT	TC	AG
Case	negative	AG	AA	AA	TT	CC	GG
Case	positive	AG	GG	AA	TT	CC	AG
Case	positive	AG	AA	TA	TT	TC	GG
Case	negative	AG	AA	AA	GT	TT	AA
Case	positive	AG	AA	TA	TT	TT	GG
Case	.	AG	AG	AA	TT	TT	GG
Case	negative	AG	AA	TT	GT	TT	GG
Case	positive	.	AA	AA	GT	TT	AG
Case	positive	AG	GG	AA	TT	TC	GG
Case	positive	AG	AA	AA	TT	TT	GG
Case	.	AA	AG	AA	TT	TT	AG
Case	positive	AG	AG	AA	TT	TC	AA
Case	positive	AA	AA	AA	TT	TC	AG
Case	.	GG	AA	TA	TT	TT	GG
Case	.	AG	AG	AA	GT	TC	GG
Case	positive	AA	GG	AA	TT	CC	GG
Case	.	AG	AA	AA	TT	TC	GG
Case	.	AG	AG	TA	TT	TC	AG
Case	.	AA	AG	TA	TT	CC	AG
Case	positive	AA	AG	AA	.	CC	AG
Case	.	AA	AA	AA	GT	CC	GG
Case	positive	AG	AA	TA	TT	TT	GG
Case	positive	AG	AG	AA	TT	TT	AG
Case	.	AA	AG	TA	GT	TC	AG
Case	.	AA	AG	AA	TT	TC	AG
Case	.	AA	AG	TA	TT	CC	GG
Case	.	AG	AA	TA	TT	TC	AG
Case	.	AG	AA	TA	TT	CC	GG
Case	positive	AA	AA	TT	TT	TC	GG
Case	.	AG	AA	AA	TT	TT	GG
Case	positive	AA	AA	AA	TT	TT	GG
Case	negative	AG	AA	TT	TT	TC	AG
Case	.	AG	GG	AA	TT	CC	GG
Case	positive	AG	AG	TA	TT	CC	GG
Case	.	AA	AG	TA	TT	TC	AG
Case	negative	AA	AA	TA	TT	TT	GG
Case	.	AG	AG	AA	TT	TC	AG
Case	positive	AA	AG	AA	TT	TC	AG
Case	positive	AG	AA	TA	TT	CC	GG
Case	negative	AA	AA	AA	TT	TT	GG
Case	positive	AG	AA	TT	GT	TT	GG
Case	positive	AA	AG	AA	TT	TC	GG
Case	positive	AA	GG	TA	TT	TC	AG
Case	.	AG	AG	TA	TT	TC	GG
Case	.	AA	AG	TA	TT	CC	GG
Case	positive	AG	AG	TT	TT	TT	GG
Case	negative	AA	AA	TA	TT	CC	AG
Case	.	AG	AA	TA	TT	TC	GG
Case	positive	AG	AA	AA	TT	TC	GG
Case	positive	AG	AA	AA	TT	TC	GG
Case	positive	AG	AG	TA	TT	TC	GG
Case	.	AG	AG	AA	TT	TC	AA
Case	positive	AG	GG	AA	TT	TT	GG
Case	positive	AA	AA	TA	TT	TC	AG
Case	negative	AA	AA	TA	TT	CC	GG
Case	.	AG	AG	AA	TT	TC	GG
Case	positive	AG	AA	AA	TT	TC	GG
Case	positive	AA	AA	TT	TT	TC	GG
Case	positive	AA	AA	TA	TT	TT	GG
Case	.	AG	AG	TA	GT	TC	AG
Case	positive	AA	AA	AA	TT	CC	GG
Case	positive	AG	AA	TA	TT	TT	AG
Case	positive	AA	AG	AA	TT	TC	GG
Case	.	AG	AA	TA	GT	TC	AA
Case	.	AG	AG	AA	TT	TT	GG
Case	positive	AG	AA	AA	TT	CC	AG
Case	.	GG	AA	AA	TT	TT	GG
Case	.	AG	AA	AA	TT	TC	GG
Case	positive	AG	AG	TA	TT	TT	GG
Case	positive	AG	AG	AA	GT	TC	GG
Case	.	AA	AA	AA	TT	TC	AG
Case	.	GG	AG	TA	TT	CC	GG
Case	.	GG	AA	TA	TT	TC	AG
Case	.	AG	AA	TA	TT	TT	GG
Case	.	AG	AG	TT	TT	CC	AG
Case	.	AA	AA	AA	TT	TC	GG
Case	positive	AG	AA	AA	TT	TC	GG
Case	.	AA	AA	AA	TT	CC	GG
Case	negative	AA	AA	TA	TT	TT	GG
Case	positive	GG	AG	AA	GT	TT	GG
Case	negative	GG	AG	AA	TT	TT	GG
Case	positive	AG	AA	AA	TT	TT	GG
Case	positive	AA	AA	AA	TT	TT	GG
Case	.	AA	GG	AA	TT	TC	AG
Case	positive	AA	GG	AA	GT	TC	GG
Case	positive	AG	AA	AA	TT	TC	AG
Case	.	.	AA	AA	GT	TC	GG
Case	.	AG	AG	AA	GT	TT	GG
Case	positive	AG	AA	AA	TT	TC	AG
Case	.	AA	AG	TT	TT	TT	GG
Case	positive	AG	AA	AA	TT	TC	GG
Case	positive	AA	AG	TA	TT	CC	GG
Case	.	AG	AA	AA	TT	TT	GG
Case	.	AG	AA	AA	GT	CC	AG
Case	.	GG	AA	TA	TT	TT	GG
Case	negative	GG	AA	TT	TT	TT	AG
Case	positive	AA	AG	TA	TT	TC	GG
Case	.	AG	GG	AA	TT	TT	AA
Case	positive	AG	AA	TA	TT	CC	AG
Case	.	.	AG	AA	TT	TT	AG
Case	.	AG	AG	AA	GT	TT	AG
Case	negative	AG	AG	TT	TT	CC	AG
Case	.	AG	AA	TT	TT	TC	AG
Case	positive	AG	AG	AA	TT	TC	AG
Case	negative	GG	AA	TT	TT	TC	AG
Case	positive	AA	AG	TT	TT	TC	GG
Case	positive	AA	AA	AA	GG	TC	GG
Case	positive	AG	AG	TT	TT	CC	AG
Case	.	AG	AA	TT	TT	CC	GG
Case	.	AG	AA	TA	TT	TC	GG
Case	.	AG	AG	TA	TT	TC	GG
Case	.	AG	AG	TA	TT	TT	GG
Case	negative	AG	AA	TA	TT	TT	AG
Case	.	AG	AG	TT	GT	TC	GG
Case	.	AA	AA	AA	TT	TC	GG
Case	.	GG	AA	AA	TT	TT	AG
Case	.	AA	AG	TA	TT	TT	GG
Case	negative	AA	GG	TA	GT	TC	GG
Case	positive	AG	AA	AA	TT	TC	AG
Case	.	GG	AG	AA	TT	TC	AG
Case	.	AA	AG	AA	.	.	AG
Case	.	AA	AG	AA	GT	CC	GG
Case	.	AA	AA	AA	GT	TC	AA
Case	.	AA	AG	TA	GT	TT	GG
Case	positive	AA	AA	TA	TT	TC	GG
Case	negative	AA	AA	TT	TT	TC	GG
Case	positive	AA	AG	TA	TT	TC	GG
Case	.	AG	AA	TA	TT	TT	GG
Case	.	AA	GG	AA	TT	TC	AG
Case	.	.	AG	TA	TT	CC	GG
Case	.	AA	AA	AA	GT	TC	GG
Case	.	AA	AG	AA	TT	TC	GG
Case	.	AG	AA	TT	TT	TT	GG
Case	positive	AG	AA	AA	TT	TT	GG
Case	positive	AG	AA	TA	TT	TC	AG
Case	.	AA	AG	AA	TT	TT	GG
Case	positive	AA	AA	AA	TT	TT	AG
Case	.	AA	AA	AA	TT	CC	AA
Case	.	AG	AG	TA	TT	TC	GG
Case	positive	AG	AG	AA	GT	CC	AG
Case	positive	AA	GG	TT	TT	CC	AG
Case	.	AG	GG	AA	TT	TC	GG
Case	positive	AA	AG	TA	GT	TT	AG
Case	.	AA	AG	TA	GT	TT	AG
Case	positive	AG	AG	AA	GT	TC	AG
Case	.	AG	GG	AA	TT	TC	GG
Case	positive	AG	AA	TA	GT	CC	GG
Case	positive	AA	AA	TA	TT	CC	AA
Case	negative	AG	AA	TA	TT	TT	AG
Case	.	AA	AA	TA	TT	CC	GG
Case	.	AG	AA	AA	TT	TT	AG
Case	.	AG	AG	TA	TT	TC	GG
Case	.	AA	AG	AA	TT	TC	GG
Case	.	AA	GG	AA	TT	TC	AG
Case	.	AG	AG	AA	TT	.	GG
Case	.	AG	GG	.	TT	TC	GG
Case	positive	AG	AA	TA	TT	TC	AG
Case	.	AG	AA	AA	TT	TC	GG
Case	.	GG	AA	AA	TT	CC	AG
Case	positive	AG	GG	TA	TT	CC	GG
Case	positive	AA	GG	TA	TT	CC	GG
Case	.	AA	AA	TT	TT	CC	GG
Case	.	AG	AG	TA	TT	TC	AG
Case	.	AG	AG	TA	TT	TT	GG
Case	.	AA	GG	AA	TT	TT	GG
Case	positive	GG	AA	AA	TT	CC	AG
Case	positive	AG	AG	TT	TT	TT	AA
Case	positive	AG	AA	AA	GT	TT	GG
Case	positive	GG	AA	AA	TT	TT	AG
Case	.	AA	AG	TA	TT	TC	AG
Case	.	AG	AG	TA	TT	TT	GG
Case	.	GG	AG	AA	TT	TC	GG
Case	.	AG	AG	TA	GT	TC	GG
Case	positive	AG	AG	TA	TT	TC	AA
Case	positive	AG	AA	TA	TT	TT	GG
Case	positive	AA	AA	AA	TT	TT	AG
Case	.	AG	AA	AA	TT	TT	GG
Case	.	AA	GG	AA	TT	TC	AG
Case	.	AA	AA	TA	TT	TC	GG
Case	negative	AA	AA	TA	TT	CC	AG
Case	.	AG	AA	AA	TT	TC	GG
Case	.	AA	AG	TA	TT	CC	AG
Case	negative	AA	AA	AA	GT	TC	AG
Case	.	GG	AA	AA	TT	.	GG
Case	.	AG	AA	AA	TT	CC	AG
Case	.	AG	AG	AA	TT	CC	GG
Case	.	AG	AA	AA	TT	TT	GG
Case	positive	GG	AA	AA	TT	TT	AG
Case	negative	AG	AG	AA	TT	TC	GG
Case	positive	GG	AG	TA	TT	TC	AG
Case	.	AA	GG	TA	TT	TC	GG
Case	positive	GG	AA	AA	TT	TT	GG
Case	.	AG	AA	AA	GT	TT	GG
Case	.	AA	AA	AA	TT	TC	GG
Case	negative	AG	AG	AA	TT	TT	GG
Case	.	GG	AG	AA	TT	CC	AA
Case	.	AG	AG	AA	TT	TC	AG
Case	positive	AA	AG	TA	TT	TC	GG
Case	.	GG	AG	AA	TT	TC	GG
Case	.	AA	AG	TA	GT	TT	AA
Case	positive	AG	AA	AA	GT	TC	GG
Case	.	AG	AA	AA	GT	TT	GG
Case	positive	AG	AG	AA	TT	TC	GG
Case	.	GG	AG	AA	TT	TC	AG
Case	positive	GG	AA	AA	TT	TC	AA
Case	.	GG	AA	TA	TT	TT	AG
Case	.	AG	AA	AA	TT	TC	GG
Case	negative	AA	AG	TA	TT	TC	AG
Case	.	GG	AG	AA	TT	CC	AG
Case	positive	AG	AG	TA	GT	TC	AA
Case	positive	.	AG	AA	TT	TC	GG
Case	positive	AA	AA	TA	TT	TT	AG
Case	negative	AG	AA	TT	TT	TT	AA
Case	positive	AG	AA	AA	TT	TC	GG
Case	positive	AG	AA	AA	TT	TT	GG
Case	negative	GG	AG	AA	GT	TC	AG
Case	negative	AG	AA	TA	TT	TC	AA
Case	.	GG	AA	TA	TT	TC	GG
Case	positive	AG	AG	AA	TT	TC	AG
Case	negative	AA	GG	TA	TT	CC	GG
Case	positive	AA	AG	AA	TT	TC	AG
Case	positive	AA	GG	TA	TT	TC	AG
Case	.	AA	AA	TA	TT	TC	GG
Case	negative	AG	AA	TA	GT	CC	GG
Case	positive	AG	AG	AA	TT	CC	GG
Case	.	AG	AA	TT	TT	CC	AG
Case	negative	AG	AA	AA	GT	CC	GG
Case	negative	AA	GG	AA	TT	TT	GG
Case	negative	AG	AA	AA	GT	TC	AG
Case	.	AA	AG	TA	TT	TT	GG
Case	positive	GG	AA	TA	GT	CC	AA
Case	positive	AA	GG	TA	TT	TC	GG
Case	.	AG	GG	TA	TT	TT	GG
Case	positive	.	AG	TA	TT	TT	AG
Case	negative	AG	AA	TA	TT	CC	AG
Case	negative	AG	AG	TA	TT	CC	GG
Case	.	AA	AA	TA	TT	TT	GG
Case	positive	AA	AG	AA	TT	TT	GG
Case	.	AG	AA	AA	TT	TC	AG
Case	positive	AG	AG	AA	TT	TC	GG
Case	.	GG	AG	TA	TT	TC	GG
Case	.	AG	AA	AA	TT	TT	GG
Case	.	AG	AG	TA	TT	TC	GG
Case	.	GG	GG	AA	TT	TT	GG
Case	negative	AG	AA	TA	TT	TT	GG
Case	.	AG	AG	TA	GT	TC	AG
Case	.	AA	AA	AA	TT	TT	AA
Case	positive	AA	AA	AA	TT	CC	GG
Case	negative	AA	AG	AA	TT	CC	GG
Case	.	AA	GG	AA	TT	TT	AG
Case	.	GG	AG	TA	TT	TC	AG
Case	.	AA	AA	AA	TT	TT	AG
Case	.	AA	AG	TA	TT	TC	AG
Case	positive	AA	AA	TA	TT	TC	GG
Case	.	AG	AA	TA	TT	TC	GG
Case	.	AG	AG	TA	TT	TT	AG
Case	positive	AG	AA	AA	TT	TC	GG
Case	negative	AA	AG	TA	TT	TC	AG
Case	positive	AA	AA	AA	TT	CC	GG
Case	positive	AA	AA	TA	TT	TC	GG
Case	positive	AG	AA	TT	TT	TC	AG
Case	negative	GG	GG	AA	TT	TC	AG
Case	positive	AG	AA	TA	TT	TC	AG
Case	.	AG	AA	AA	TT	TC	GG
Case	positive	AA	AA	AA	TT	CC	AG
Case	.	AG	AA	AA	TT	CC	GG
Case	positive	AG	AA	AA	TT	CC	GG
Case	.	AA	GG	AA	TT	TC	GG
Case	.	AG	AG	TA	TT	TC	GG
Case	positive	AG	AA	AA	TT	CC	GG
Case	.	AG	AG	TA	TT	TT	GG
Case	positive	AG	AG	AA	TT	TC	AG
Case	.	GG	AG	TT	GT	TT	AG
Case	negative	AG	AA	TA	TT	TC	GG
Case	positive	AA	AG	TA	TT	TC	AG
Case	positive	AG	AG	TA	TT	CC	GG
Case	positive	AA	AA	AA	GT	TT	GG
Case	.	AA	AG	TA	TT	TC	GG
Case	positive	AG	GG	TA	GT	TC	GG
Case	negative	AA	AA	AA	GT	CC	GG
Case	negative	GG	AG	TA	TT	CC	GG
Case	positive	AG	AA	TA	TT	TC	AG
Case	.	AA	AG	AA	GT	TT	GG
Case	positive	AA	AA	AA	TT	CC	GG
Case	negative	AA	AG	TA	TT	TT	GG
Case	positive	AG	AA	TA	TT	TC	GG
Case	.	AG	AG	TA	TT	TC	AA
Case	.	AG	AG	TA	TT	CC	AA
Case	positive	AG	AA	TT	TT	TC	GG
Case	.	AA	AA	TA	GT	CC	GG
Case	positive	AG	GG	AA	TT	CC	AA
Case	negative	AA	AG	AA	TT	CC	GG
Case	negative	AG	AA	AA	TT	TC	GG
Case	positive	AG	AA	AA	TT	TC	GG
Case	.	GG	AA	TA	TT	TT	GG
Case	.	AG	AA	AA	GT	TC	GG
Case	.	AA	AA	TA	TT	CC	AG
Case	.	GG	AA	TA	TT	TT	GG
Case	.	AG	AG	TA	TT	TT	AG
Case	.	AA	AA	AA	TT	TT	AG
Case	.	AG	AG	AA	TT	TC	AA
Case	.	AA	AA	AA	TT	CC	GG
Case	positive	AG	AA	AA	TT	TC	AG
Case	.	GG	AA	TT	TT	TT	AG
Case	.	AG	AA	TT	TT	TC	GG
Case	.	AG	AA	AA	TT	CC	GG
Case	.	AG	AG	TA	TT	TT	AG
Case	.	AG	AA	TT	TT	CC	GG
Case	.	AG	AA	TT	TT	CC	GG
Case	.	AA	AG	AA	TT	CC	AG
Case	.	AG	AG	TA	TT	TT	GG
Case	positive	AA	AA	TA	TT	TC	GG
Case	.	AG	AG	TA	TT	TC	AG
Case	negative	AA	AG	AA	GT	TC	GG
Case	negative	AA	AA	TA	TT	TT	AA
Case	positive	AA	AA	AA	TT	TC	GG
Case	positive	GG	AG	AA	GT	TT	GG
Case	negative	GG	AG	AA	TT	TC	GG
Case	positive	AG	AG	AA	TT	TT	AG
Case	negative	AA	AA	TA	TT	TC	GG
Case	positive	AA	AA	AA	TT	TC	AG
Case	positive	GG	AA	TT	TT	TT	AG
Case	positive	AA	.	AA	TT	CC	GG
Case	positive	AG	AA	AA	TT	TT	AG
Case	positive	AG	AG	AA	TT	TT	AG
Case	positive	AG	AA	TA	TT	TT	AG
Case	positive	GG	AG	AA	GT	TT	AA
Case	positive	AG	AG	AA	TT	TC	GG
Case	positive	AA	AA	AA	TT	TT	GG
Case	positive	AA	AG	TA	TT	TC	AG
Case	positive	AA	AG	TT	GT	TC	GG
Case	negative	AG	AA	AA	TT	TT	AG
Case	positive	AG	AG	TT	TT	TC	GG
Case	negative	AG	AA	TT	TT	TC	GG
Case	positive	AG	AG	AA	TT	TC	AG
Case	negative	GG	GG	AA	TT	CC	AA
Case	positive	AA	AA	AA	GT	TT	AG
Case	positive	GG	AG	AA	TT	TT	AG
Case	positive	AG	AA	AA	TT	TT	GG
Case	positive	AA	AA	AA	TT	CC	AG
Case	positive	AA	AA	AA	TT	CC	AA
Case	positive	AG	AG	TA	TT	CC	GG
Case	positive	AG	AG	TA	TT	TC	AG
Case	positive	AA	AA	TT	TT	TC	AG
Case	positive	AA	AA	AA	TT	TC	GG
Case	positive	AA	.	.	.	CC	.
Case	negative	AG	AG	AA	TT	CC	GG
Case	positive	AG	GG	AA	TT	TC	AG
Case	positive	AG	AG	AA	TT	TC	GG
Case	positive	AG	AA	AA	TT	TC	GG
Case	positive	AG	AA	TA	GT	CC	AG
Case	positive	AG	AA	AA	GT	TC	GG
Case	positive	AG	AG	AA	TT	TC	AG
Case	positive	AA	AG	AA	GT	TT	GG
Case	positive	AA	AG	AA	GT	CC	GG
Case	.	AA	AA	TT	TT	CC	AG
Case	positive	AA	AA	AA	TT	TT	GG
Case	positive	AG	AG	TA	GT	TT	AG
Case	.	AA	AA	TA	TT	TC	AA
Case	positive	AG	AA	AA	GT	CC	GG
Case	positive	AG	AA	AA	TT	TC	AG
Case	positive	AA	GG	TA	TT	CC	GG
Case	positive	AG	AG	TA	TT	CC	AG
Case	negative	AG	AG	AA	GT	TC	AA
Case	positive	AG	AG	AA	TT	TC	AG
Case	positive	AG	AA	TT	TT	TT	GG
Case	positive	GG	AA	TA	TT	TC	AG
Case	negative	AA	AG	TA	TT	CC	GG
Case	positive	AG	AG	TT	TT	TC	GG
Case	positive	AG	AG	TA	GT	TT	GG
Case	positive	GG	AG	AA	TT	CC	GG
Case	positive	AA	AG	TA	TT	TC	GG
Case	positive	GG	AG	TA	TT	TC	GG
Case	.	AA	AG	AA	TT	TT	GG
Case	positive	AA	AG	AA	TT	TT	GG
Case	positive	AA	AA	TA	GT	TT	AA
Case	negative	AA	AG	TT	TT	TT	GG
Case	.	AA	AG	TA	TT	CC	GG
Case	positive	AA	AG	AA	TT	TC	GG
Case	.	AA	.	.	.	TC	.
Case	.	AG	AG	TA	TT	TT	GG
Case	positive	AG	GG	AA	TT	TT	GG
Case	positive	AA	AA	AA	TT	TT	GG
Case	positive	AG	AA	TT	TT	TC	GG
Case	positive	AG	AA	AA	GT	TC	GG
Case	positive	AA	AA	AA	GT	TT	GG
Case	negative	AA	AG	TA	TT	TT	AG
Case	positive	AG	AA	TA	TT	TT	GG
Case	positive	AG	AA	TA	TT	CC	GG
Case	.	AG	AG	AA	GT	TC	GG
Case	negative	AA	AG	AA	TT	TC	AG
Case	positive	AG	AA	TA	TT	TC	GG
Case	.	AG	AG	AA	TT	TC	GG
Case	positive	GG	GG	TA	TT	TC	GG
Case	.	AG	AA	AA	TT	TC	GG
Case	.	AG	AA	TA	TT	TC	GG
Case	positive	AG	GG	TA	TT	TT	GG
Case	positive	AG	AG	TA	GT	TC	AG
Case	positive	AG	AA	AA	TT	TT	AA
Case	positive	AG	AA	AA	TT	TC	GG
Case	.	AA	AA	TA	TT	TT	GG
Case	.	AA	AA	TA	TT	.	GG
Case	positive	AG	AA	TT	TT	CC	GG
Case	.	GG	AG	AA	TT	TT	AG
Case	negative	AG	AG	AA	TT	TC	GG
Case	positive	GG	AG	TT	TT	TT	AG
Case	positive	AA	AG	TA	TT	TT	GG
Case	positive	AA	.	.	.	TC	.
Case	.	AG	AA	TA	TT	TT	AG
Case	.	AG	AG	TA	TT	TT	AG
Case	.	AA	AA	TA	TT	TC	GG
Case	positive	GG	AA	TA	TT	TT	GG
Case	negative	GG	AA	TA	GT	TT	GG
Case	.	AA	AG	TA	GT	TC	GG
Case	positive	AA	AG	TA	TT	TC	AG
Case	positive	AG	AG	TA	TT	TC	AG
Case	positive	AA	AA	TA	TT	TC	AG
Case	.	AG	AA	AA	TT	CC	GG
Case	negative	GG	AA	AA	TT	CC	GG
Case	positive	AA	AG	TT	TT	TT	AA
Case	positive	AG	AG	AA	TT	TT	AG
Case	negative	GG	AA	AA	TT	CC	GG
Case	positive	GG	AG	TA	TT	TC	AG
Case	positive	GG	AA	AA	TT	TT	AG
Case	positive	GG	AG	TA	TT	TT	AG
Case	negative	GG	GG	AA	GT	TC	GG
Case	negative	AG	GG	AA	TT	CC	AG
Case	positive	AG	AA	AA	TT	TT	AG
Case	positive	AA	AA	TA	TT	TC	GG
Case	.	GG	AG	TA	TT	CC	AG
Case	.	AA	AA	TA	TT	TT	AG
Case	negative	AG	AG	AA	TT	TT	GG
Case	positive	GG	AA	TA	TT	TC	GG
Case	.	AA	AA	TT	TT	TC	AG
Case	positive	AA	AG	AA	TT	TC	AA
Case	.	AG	AA	TT	TT	TC	AG
Case	.	.	AG	TT	.	TT	GG
Case	negative	AA	AA	TT	TT	TT	GG
Case	.	AG	AA	AA	GT	CC	GG
Case	positive	AG	AG	AA	GG	TT	GG
Case	.	AA	AA	TA	TT	TC	AG
Case	.	AG	GG	.	TT	TC	GG
Case	positive	AG	AA	AA	TT	TC	GG
Case	.	AG	AA	AA	TT	TC	AG
Case	.	AA	AA	AA	TT	TT	GG
Case	positive	AA	AG	AA	TT	TT	GG
Case	.	AA	AA	AA	TT	TT	GG
Case	.	AG	AG	AA	GG	CC	AG
Case	.	AA	AG	AA	GG	TT	AG
Case	positive	AA	AG	TA	TT	TT	GG
Case	positive	AG	AG	AA	TT	TC	AG
Case	positive	AG	AG	AA	TT	TT	AG
Case	positive	GG	AA	TT	TT	TT	AG
Case	positive	AA	AG	TT	TT	TC	GG
Case	positive	AG	AG	AA	TT	TT	AG
Case	positive	AG	AG	AA	TT	TC	AG
Case	positive	GG	AA	TT	TT	TC	AA
Case	positive	GG	AG	AA	TT	TC	GG
Case	negative	AG	GG	AA	TT	TC	GG
Case	positive	AA	AA	AA	TT	TT	AG
Case	positive	AG	AG	TA	TT	TC	GG
Case	positive	AG	AA	TA	GT	TC	GG
Case	positive	AA	AA	TA	GT	TC	AG
Case	negative	AG	AA	AA	TT	TC	GG
Case	positive	AA	AG	AA	TT	CC	GG
Case	positive	AA	AG	AA	TT	TC	GG
Case	positive	GG	GG	AA	TT	TC	GG
Case	positive	GG	AG	TT	TT	TC	AG
Case	.	AG	AA	TA	TT	TT	AG
Case	.	AA	AA	TA	TT	TT	GG
Case	positive	AA	AA	AA	TT	TC	AG
Case	.	GG	AG	AA	TT	CC	AG
Case	positive	AA	AA	AA	TT	TC	GG
Case	negative	GG	AG	TA	TT	TT	AG
Case	positive	AA	AG	AA	TT	TC	GG
Case	positive	AA	AG	TA	TT	TC	GG
Case	positive	AG	AA	AA	TT	TT	AG
Case	negative	AG	AA	AA	TT	TC	AG
Case	positive	AG	AA	TA	TT	TC	GG
Case	positive	AA	AA	TT	TT	CC	AA
Case	positive	AG	AA	TA	TT	TT	AG
Case	positive	AA	AG	AA	TT	TC	AG
Case	negative	GG	AA	AA	TT	TT	GG
Case	negative	AA	AA	AA	TT	TC	GG
Case	positive	AG	AA	TA	TT	TC	GG
Case	positive	AG	GG	AA	TT	TT	AA
Case	positive	AG	GG	AA	TT	TT	AA
Case	positive	AA	AG	TA	TT	CC	GG
Case	negative	GG	AA	TA	GT	TC	GG
Case	negative	AG	AG	AA	TT	TC	GG
Case	positive	AA	AG	TA	TT	CC	GG
Case	negative	AA	AA	AA	TT	TC	AA
Case	positive	.	.	.	.	.	.
Case	positive	AG	AA	TT	TT	TC	GG
Case	positive	AA	AA	TT	GT	TC	AG
Case	negative	GG	AA	AA	TT	TC	AG
Case	positive	AG	AG	AA	TT	TC	AG
Case	positive	GG	AG	TA	TT	CC	GG
Case	positive	AA	AG	TA	GT	CC	AG
Case	positive	AA	AA	TA	TT	CC	GG
Case	positive	GG	AG	AA	TT	TT	GG
Case	negative	AA	AG	TA	GT	TT	GG
Case	positive	AG	AG	TA	TT	TC	GG
Case	.	AA	AG	TT	TT	CC	GG
Case	positive	AG	AA	TA	GT	TC	AG
Case	positive	AG	AA	AA	GT	TC	GG
Case	.	AA	GG	AA	TT	TC	AG
Case	positive	AG	AA	AA	TT	TT	AG
Case	positive	GG	AA	AA	TT	CC	GG
Case	.	AA	AG	TA	TT	TT	AG
Case	positive	AG	AA	AA	TT	TC	GG
Case	positive	AA	AG	AA	TT	TT	AG
Case	positive	AA	AG	AA	TT	TC	GG
Case	positive	AG	AG	TA	TT	TC	AG
Case	positive	AG	AG	AA	TT	TC	AG
Case	.	.	AG	TT	TT	.	GG
Case	positive	AA	AG	TA	TT	CC	GG
Case	.	AG	AG	TA	TT	TC	AG
Case	positive	AA	GG	TA	GT	TC	GG
Case	positive	AA	AA	TT	TT	CC	AG
Case	positive	AA	AG	TA	TT	TT	AG
Case	positive	.	AG	AA	TT	TT	GG
Case	negative	GG	AG	AA	TT	TC	GG
Case	positive	.	AA	AA	TT	TT	GG
Case	positive	AA	AA	AA	TT	TT	GG
Case	.	AG	AG	TA	TT	TC	AG
Case	positive	AA	AA	TA	TT	TC	GG
Case	positive	AG	AA	TA	TT	TC	AG
Case	positive	AA	AA	TA	TT	TC	GG
Case	positive	GG	AA	AA	TT	TC	GG
Case	positive	AA	AA	AA	TT	TC	GG
Case	positive	GG	AA	AA	TT	TC	GG
Case	positive	GG	AG	AA	TT	TC	AG
Case	.	AG	AA	TA	TT	TC	GG
Case	positive	AG	AG	TA	TT	TC	AG
Case	.	.	AG	AA	TT	TC	GG
Case	.	AG	AG	TA	TT	TC	GG
Case	positive	GG	AG	TA	GT	TT	AG
Case	.	AA	AG	AA	TT	CC	GG
Case	positive	AA	AG	AA	GT	TT	AG
Case	positive	AG	AA	TA	TT	TC	AA
Case	positive	AG	AG	TA	TT	TT	AG
Case	negative	.	AA	AA	TT	.	GG
Case	positive	GG	AA	TT	TT	TC	AG
Case	positive	AA	AG	AA	TT	TC	GG
Case	positive	AA	AA	TA	TT	TT	AG
Case	negative	AA	GG	AA	TT	TT	AG
Case	positive	GG	AA	TA	TT	CC	GG
Case	positive	AG	AA	AA	TT	TT	GG
Case	positive	GG	AG	AA	TT	CC	GG
Case	positive	GG	AG	AA	TT	TC	GG
Case	positive	GG	AA	TT	TT	CC	GG
Case	positive	AA	GG	AA	TT	TT	AG
Case	positive	AG	AA	AA	TT	TC	AG
Case	positive	GG	AA	TA	TT	TT	AG
Case	positive	.	AA	AA	GT	.	GG
Case	negative	AG	AG	AA	TT	CC	AG
Case	negative	AG	AG	TT	TT	TC	AG
Case	negative	AG	GG	AA	TT	TC	AG
Case	positive	AA	AG	TA	TT	CC	GG
Case	positive	AG	AA	TA	TT	TT	GG
Case	positive	AA	GG	TT	TT	CC	AG
Case	positive	AA	AA	TA	GT	CC	GG
Case	positive	AG	AG	TA	GT	TC	GG
Case	positive	AA	GG	TA	TT	TC	GG
Case	positive	AG	AA	TA	TT	TC	AG
Case	.	AA	AG	AA	TT	TC	AA
Case	positive	AA	AG	TA	TT	TC	AG
Case	positive	AG	GG	TT	TT	CC	GG
Case	.	GG	AA	TA	TT	TC	GG
Case	.	AG	AG	AA	TT	TT	AG
Case	positive	AA	AA	AA	TT	TC	AA
Case	.	AG	AA	AA	TT	TT	GG
Case	positive	AG	AA	AA	TT	TT	AG
Case	positive	AG	AG	AA	GT	TT	GG
Case	positive	AA	AA	TA	TT	CC	GG
Case	positive	AG	AG	AA	TT	CC	AG
Case	negative	AG	AG	TA	GT	TC	AG
Case	.	AG	AG	TA	TT	TT	GG
Case	positive	AG	AA	AA	TT	CC	GG
Case	positive	AG	AG	TA	TT	TC	GG
Case	negative	GG	AA	TT	TT	TT	AG
Case	positive	AA	AA	AA	TT	TC	GG
Case	.	AA	GG	AA	TT	CC	AG
Case	negative	AG	AA	AA	TT	TC	GG
Case	positive	AG	AG	AA	TT	TT	GG
Case	positive	AA	AA	AA	GT	TT	GG
Case	positive	AG	GG	TT	TT	TC	AG
Case	positive	.	GG	TA	.	TC	GG
Case	.	AA	AA	TA	TT	TC	GG
Case	positive	GG	AA	TA	TT	TC	GG
Case	positive	AG	AG	AA	GT	TT	AG
Case	negative	GG	AG	TA	TT	TC	GG
Case	positive	AA	AG	AA	TT	TC	GG
Case	positive	AA	AA	TA	TT	TT	AG
Case	positive	.	AA	AA	TT	.	GG
Case	positive	GG	AA	TA	TT	TC	GG
Case	negative	AG	AG	AA	TT	TT	AA
Case	positive	AG	AA	AA	TT	TC	AG
Case	positive	GG	AA	TA	GT	CC	GG
Case	positive	AA	AG	TA	TT	TC	GG
Case	positive	AA	GG	AA	TT	TC	GG
Case	positive	AA	GG	TT	TT	TT	GG
Case	positive	AG	AG	TA	GT	TC	GG
Case	positive	AA	AG	AA	GT	TC	AG
Case	positive	AA	AG	TT	TT	CC	GG
Case	negative	AA	AA	TA	TT	TT	AG
Case	positive	AA	AA	AA	GT	TC	GG
Case	.	AG	AG	AA	TT	TT	AG
Case	positive	AA	GG	AA	TT	TT	GG
Case	positive	AA	AA	TA	TT	TT	AG
Case	positive	GG	AG	TA	TT	TT	GG
Case	positive	GG	AA	TA	TT	CC	GG
Case	.	GG	AA	TA	TT	TC	GG
Case	positive	AG	AG	TA	TT	CC	AG
Case	positive	GG	AA	TA	TT	TC	GG
Case	positive	AA	AA	AA	TT	TC	AG
Case	positive	AG	AA	AA	TT	TC	AG
Case	positive	AA	AG	TT	TT	TT	GG
Case	positive	AA	AG	TT	TT	TT	AG
Case	positive	AG	AG	AA	TT	TC	AG
Case	negative	AG	AG	TT	TT	TC	AG
Case	negative	AG	AA	AA	TT	TC	GG
Case	positive	AG	AA	AA	TT	TC	GG
Case	positive	AG	AG	TT	TT	CC	GG
Case	positive	GG	AG	AA	TT	CC	GG
Case	positive	AG	AA	TA	TT	TC	GG
Case	positive	AA	AG	TA	TT	TT	GG
Case	positive	AG	AA	AA	TT	CC	GG
Case	positive	AG	AG	AA	GT	CC	GG
Case	positive	AG	GG	AA	TT	TT	AA
Case	positive	AA	AG	TA	TT	TC	AG
Case	.	AA	AG	TA	TT	CC	GG
Case	positive	.	AA	TA	TT	TT	GG
Case	positive	AG	AG	TT	TT	TT	GG
Case	positive	AA	AA	TA	GT	TC	GG
Case	positive	.	AG	AA	TT	.	GG
Case	positive	AA	AG	TT	TT	TT	GG
Case	positive	AG	AG	TT	TT	TT	AG
Case	positive	AA	GG	TA	TT	TC	GG
Case	.	AG	AA	AA	GT	TC	GG
Case	negative	AG	AG	TA	TT	TT	GG
Case	positive	AG	AA	TA	TT	CC	GG
Case	.	AG	AG	TA	TT	TC	GG
Case	negative	GG	AG	TA	TT	TC	AA
Case	positive	GG	AG	TA	TT	TC	AG
Case	positive	AA	AG	AA	TT	TC	GG
Case	positive	AG	AA	AA	TT	CC	AG
Case	positive	AA	AG	TT	TT	TT	GG
Case	positive	AA	AG	AA	TT	TC	GG
Case	positive	AA	AG	AA	TT	TT	AG
Case	positive	AG	AG	TT	TT	TC	AG
Case	positive	AA	AG	AA	TT	TC	AG
Case	positive	AA	AG	TA	TT	TC	GG
Case	.	AA	AA	TA	TT	TC	AG
Case	.	GG	AA	AA	TT	TT	AG
Case	positive	AG	AG	TA	TT	TT	AA
Case	negative	AG	AA	TA	TT	TT	AG
Case	.	AG	AG	TA	TT	TC	AG
Case	positive	.	AA	TA	TT	.	GG
Case	positive	AG	AG	AA	GT	TT	GG
Case	negative	AA	AG	AA	TT	CC	GG
Case	negative	AA	AA	AA	TT	TC	AG
Case	positive	AG	AG	TT	TT	TT	AA
Case	positive	AG	AA	AA	TT	CC	AG
Case	positive	AG	AA	TA	TT	CC	AA
Case	positive	AA	AG	AA	GT	TT	GG
Case	positive	AA	GG	AA	TT	TC	GG
Case	positive	AA	AG	TA	TT	TT	GG
Case	positive	AG	AG	AA	TT	TC	GG
Case	negative	AA	AA	TT	TT	TT	AG
Case	positive	AA	AA	TA	TT	TC	AG
Case	positive	GG	AG	AA	TT	TC	GG
Case	positive	AG	AG	AA	TT	TC	AG
Case	negative	AA	AG	AA	TT	TC	AG
Case	positive	AG	AG	TA	TT	TC	GG
Case	positive	AA	AA	TA	TT	CC	GG
Case	positive	AA	AA	AA	TT	TC	GG
Case	positive	GG	AG	TT	TT	CC	AG
Case	negative	AA	AG	TA	TT	TT	GG
Case	negative	AG	AG	TA	TT	TT	AG
Case	positive	AA	AG	AA	TT	TT	GG
Case	negative	AA	AG	TA	TT	CC	GG
Case	negative	AA	AG	AA	GT	CC	AG
Case	negative	AG	AG	TA	TT	TT	GG
Case	positive	AA	AA	AA	TT	TT	GG
Case	positive	AG	GG	AA	TT	TC	AG
Case	positive	AG	AG	AA	GT	CC	AG
Case	positive	AA	AA	AA	TT	CC	AG
Case	positive	AG	AA	TA	TT	TC	AG
Case	positive	GG	GG	AA	TT	TT	GG
Case	positive	AG	AA	TT	TT	TC	AG
Case	positive	AA	AG	AA	TT	TC	GG
Case	positive	GG	AG	AA	TT	TC	GG
Case	negative	AA	AA	AA	TT	TT	GG
Case	positive	AG	AA	TT	TT	TC	AG
Case	positive	AG	AG	AA	GG	TC	GG
Case	negative	AG	AG	TT	TT	TC	AG
Case	positive	GG	GG	TA	GT	TC	AA
Case	positive	AG	AG	AA	TT	TC	AG
Case	negative	GG	AA	AA	TT	TT	AG
Case	negative	AA	AA	AA	TT	TT	GG
Case	positive	AG	AG	TT	GT	TC	AG
Case	negative	AA	AA	AA	TT	TC	GG
Case	negative	AG	AA	AA	TT	TT	GG
Case	negative	GG	AA	AA	TT	TC	GG
Case	positive	AA	AG	AA	TT	TT	AG
Case	positive	AA	AG	TA	GT	TC	AG
Case	negative	AG	GG	TA	TT	TT	GG
Case	positive	GG	AG	TA	GT	CC	GG
Case	positive	AA	AA	TA	TT	TC	AG
Case	negative	AA	AG	AA	TT	TC	AG
Case	negative	AG	AG	AA	TT	TC	GG
Case	positive	AA	AA	AA	TT	TC	GG
Case	positive	GG	GG	AA	GT	TT	AG
Case	negative	.	AA	TA	TT	TT	AG
Case	positive	GG	AG	AA	GT	TC	GG
Case	positive	AG	AG	TT	GT	TC	AA
Case	negative	.	GG	AA	TT	.	GG
Case	positive	AA	AA	TA	TT	TT	GG
Case	positive	AG	AG	TA	TT	TC	AG
Case	negative	AA	AG	TA	TT	TC	GG
Case	negative	AA	AG	TA	TT	TT	AG
Case	positive	AA	AA	AA	TT	TC	GG
Case	positive	AG	AG	AA	GT	TT	GG
Case	.	AG	AG	AA	GT	TT	GG
Case	positive	AG	AG	AA	GT	TC	GG
Case	positive	AG	AA	TA	TT	TT	GG
Case	positive	AG	AG	TT	TT	CC	GG
Case	positive	GG	AG	TA	TT	CC	GG
Case	positive	GG	AA	AA	GT	TT	AG
Case	negative	AA	AA	AA	TT	TC	GG
Case	.	AA	AA	TA	TT	TT	AG
Case	negative	AA	AA	TA	GT	TT	GG
Case	positive	AA	AA	TT	TT	TT	AG
Case	.	AG	AA	AA	TT	TT	AG
Case	negative	GG	GG	AA	TT	TT	AG
Case	positive	AA	AA	AA	TT	TT	AG
Case	negative	AA	AA	TA	TT	TT	GG
Case	positive	AG	AA	TA	TT	TC	AA
Case	.	AA	AA	TT	TT	TC	GG
Case	positive	AG	GG	TT	GT	CC	AA
Case	positive	AG	AA	TA	TT	TC	GG
Case	positive	AG	GG	AA	TT	TC	GG
Case	.	AG	AG	AA	TT	TT	AG
Case	positive	AG	AA	AA	TT	TC	GG
Case	positive	AG	AG	AA	TT	TC	AG
Case	positive	AG	AG	TA	GT	TC	AG
Case	positive	AG	AG	TA	TT	CC	GG
Case	positive	AG	AG	TT	TT	CC	GG
Case	.	AG	AG	TA	TT	TT	AG
Case	.	AG	AG	AA	TT	TC	AG
Case	negative	AA	AG	AA	TT	TC	GG
Case	positive	AA	AG	TA	TT	TC	GG
Case	positive	.	AG	TT	TT	.	AG
Case	.	AA	AA	TA	GG	CC	AG
Case	positive	AG	AA	AA	TT	TT	GG
Case	.	AG	AG	TA	GT	TT	GG
Case	positive	AA	AA	TT	TT	TT	GG
Case	negative	GG	AA	TT	TT	TC	AG
Case	positive	AG	AA	TA	TT	TT	GG
Case	positive	AA	AA	AA	TT	TC	AG
Case	positive	AG	AA	AA	TT	TC	GG
Case	positive	AG	AA	TA	TT	TT	GG
Case	positive	GG	AA	TA	TT	TT	GG
Case	.	AG	AG	TA	TT	TC	AG
Case	positive	AG	AA	TT	TT	TC	AG
Case	negative	AG	AG	AA	TT	TT	GG
Case	.	AA	AA	TT	TT	CC	GG
Case	.	GG	AG	TA	TT	TT	GG
Case	negative	.	AA	AA	TT	TC	GG
Case	positive	AG	AG	AA	TT	TC	GG
Case	positive	AA	AA	AA	TT	TT	GG
Case	positive	AA	AA	AA	TT	TT	AG
Case	positive	AG	AG	AA	TT	TT	AG
Case	positive	AG	AG	TA	GT	TT	AG
Case	positive	AA	AA	TA	TT	TT	AG
Case	positive	AA	AG	TA	TT	TT	AG
Case	positive	AG	GG	AA	GT	TC	AG
Case	positive	AA	AG	AA	GT	CC	GG
Case	positive	AG	AG	AA	GG	TT	AG
Case	.	AA	AA	TA	TT	TT	GG
Case	positive	AG	GG	TA	TT	CC	GG
Case	negative	AG	GG	TT	GT	TC	AG
Case	negative	GG	AG	AA	TT	TT	GG
Case	negative	AG	AG	AA	TT	TC	AG
Case	positive	AG	AA	AA	GT	TC	AG
Case	positive	AG	AG	AA	TT	TC	GG
Case	positive	AA	AA	AA	TT	CC	AG
Case	positive	AA	GG	TA	TT	TC	GG
Case	positive	GG	GG	TA	GT	TC	AG
Case	negative	GG	AG	TA	GT	TC	GG
Case	positive	GG	AG	AA	TT	CC	GG
Case	positive	AG	GG	AA	TT	TT	AA
Case	positive	AA	GG	TT	TT	CC	AG
Case	positive	AG	AA	AA	GT	TC	AG
Case	.	AG	AA	AA	GT	TT	GG
Case	.	AA	AA	AA	TT	TC	GG
Case	.	AG	AA	TT	TT	TC	AG
Case	positive	AG	AA	TA	TT	TC	AG
Case	positive	AA	GG	TA	TT	CC	GG
Case	positive	GG	AG	TA	TT	TT	GG
Case	positive	AG	AA	AA	GT	TC	GG
Case	positive	AG	AA	TA	GT	CC	AG
Case	positive	.	AG	AA	TT	.	AG
Case	positive	AA	AG	TA	TT	TT	AG
Case	positive	AA	AG	TT	GT	TT	GG
Case	positive	AA	AG	TA	TT	TC	AG
Case	.	AA	AG	TA	TT	TC	AG
Case	.	AG	AA	TA	GT	TC	GG
Case	positive	AG	AG	AA	GT	TC	AG
Case	positive	GG	AG	AA	TT	TC	GG
Case	positive	AG	AG	TT	TT	TC	GG
Case	.	AA	GG	AA	TT	TC	GG
Case	positive	AA	AG	AA	TT	TC	GG
Case	positive	AG	AG	TA	TT	TC	GG
Case	positive	AG	AG	TT	GT	TT	AA
Case	.	AG	AA	AA	GT	TC	AG
Case	positive	AG	AG	TA	TT	TC	AG
Case	positive	AA	AA	AA	TT	TT	GG
Case	positive	GG	AG	TA	TT	TT	GG
Case	positive	AG	AA	TA	TT	TT	AG
Case	positive	AA	GG	TA	GT	TC	GG
Case	positive	AA	AG	AA	TT	TT	AG
Case	positive	AG	AA	AA	TT	TC	GG
Case	positive	AG	AA	TT	GT	TT	AG
Case	positive	AA	AA	AA	TT	TT	GG
Case	negative	.	AA	TA	TT	.	AG
Case	positive	AG	AA	TA	GT	TC	GG
Case	positive	AA	AG	AA	TT	TT	GG
Case	.	GG	AA	AA	TT	TC	GG
Case	positive	AG	AA	AA	GT	TT	AG
Case	positive	AA	GG	AA	TT	TC	AG
Case	positive	AA	AG	TA	TT	CC	GG
Case	.	AG	AA	TA	TT	TC	GG
Case	.	AA	GG	TA	TT	TC	GG
Case	positive	GG	AG	TA	TT	CC	GG
Case	.	AG	GG	AA	TT	TC	AG
Case	positive	GG	AG	AA	TT	TC	AG
Case	positive	AG	AA	AA	TT	TC	AG
Case	.	AA	AG	TA	TT	TT	GG
Case	positive	.	GG	AA	TT	.	GG
Case	positive	AA	AG	AA	.	.	.
Case	.	GG	GG	AA	TT	CC	AG
Case	positive	AG	AG	TA	TT	TT	GG
Case	positive	AG	GG	AA	TT	TC	AG
Case	negative	AG	AA	TA	TT	TC	GG
Case	negative	AG	AA	AA	TT	CC	AG
Case	positive	.	AG	AA	TT	.	GG
Case	negative	AA	AG	AA	TT	TC	GG
Case	negative	AA	AA	TT	GT	CC	AG
Case	negative	AA	AA	AA	TT	TT	AG
Case	positive	AG	AA	AA	TT	TC	GG
Case	positive	AA	AA	AA	TT	TT	GG
Case	positive	AG	AG	AA	TT	TC	AA
Case	negative	AA	AG	TA	TT	CC	AG
Case	positive	AA	AG	AA	.	TC	GG
Case	positive	AG	AA	AA	.	TT	AG
Case	positive	AG	AA	TT	TT	CC	GG
Case	positive	AA	AA	AA	GT	TT	AG
Case	positive	AA	GG	AA	TT	TC	AA
Case	positive	AG	AG	TA	TT	TT	AG
Case	positive	AA	AA	AA	TT	TC	GG
Case	positive	AG	AG	AA	TT	TC	GG
Case	negative	AA	AG	TT	TT	TC	AG
Case	positive	AA	AG	AA	TT	TC	GG
Case	negative	AA	AG	TT	TT	TC	AG
Case	positive	AA	AG	TT	.	CC	GG
Case	positive	AA	AG	TT	TT	TT	AA
Case	positive	AG	AA	TA	TT	TT	AG
Case	positive	AA	AG	AA	TT	TT	AG
Case	positive	AG	AA	AA	TT	TC	GG
Case	positive	AG	AA	TA	TT	TC	AG
Case	positive	AG	GG	AA	TT	TT	AA
Case	positive	GG	GG	TT	.	.	.
Case	negative	AA	AA	TA	TT	TC	AG
Case	positive	AG	AA	TA	GT	TT	GG
Case	positive	AG	AG	TT	TT	TC	AG
Case	positive	AA	AG	.	.	CC	GG
Case	negative	AA	AA	TA	GT	CC	GG
Case	positive	AG	AA	TA	TT	TT	GG
Case	positive	.	AA	TA	.	.	.
Case	negative	AA	.	.	.	CC	.
Case	positive	.	AG	AA	TT	TC	GG
Case	positive	AG	GG	.	.	TT	.
Case	negative	AG	AA	AA	.	CC	GG
Case	negative	AG	AA	TA	TT	TC	AA
Case	positive	AA	AG	TT	.	TC	AG
Case	negative	GG	AA	AA	TT	TT	GG
Case	negative	AG	AA	TT	TT	TC	GG
Case	positive	AG	AG	AA	TT	TT	AG
Case	positive	AA	AA	AA	TT	CC	GG
Case	positive	AA	AA	AA	TT	TC	GG
Case	positive	GG	AG	TA	TT	TC	AG
Case	.	AG	AG	AA	TT	TC	GG
Case	.	.	AA	AA	TT	.	GG
Case	.	AG	AG	AA	TT	TC	GG
Case	positive	AA	AA	TA	TT	CC	AG
Case	positive	AA	AA	TA	TT	TC	GG
Case	positive	AG	AA	AA	TT	CC	AG
Case	positive	AG	AG	AA	TT	TT	AG
Case	positive	AA	AA	AA	TT	TT	AG
Case	negative	AG	AG	AA	TT	CC	AA
Case	positive	AG	AG	.	.	CC	.
Case	positive	AG	AA	TA	TT	TC	GG
Case	positive	AG	AA	TA	GG	CC	GG
Case	negative	AG	AG	TA	TT	TT	GG
Case	positive	AG	AA	TA	TT	TC	AG
Case	negative	AA	AG	TT	TT	TC	AA
Case	positive	AG	AG	AA	TT	TC	GG
Case	negative	AG	AA	AA	TT	CC	AG
Case	positive	AG	AG	TA	GT	TT	AG
Case	positive	AA	AG	AA	TT	TC	GG
Case	positive	AA	AG	AA	GT	TC	AG
Case	positive	AG	AG	AA	TT	TC	AG
Case	positive	GG	AG	AA	TT	TC	AG
Case	negative	AG	AA	TA	TT	CC	AG
Case	positive	AG	AG	AA	GT	TC	GG
Case	positive	AA	AG	TA	TT	TC	GG
Case	positive	AG	AG	AA	TT	TT	GG
Case	positive	AA	AG	TA	TT	CC	GG
Case	positive	AA	AG	TA	TT	TT	GG
Case	positive	AA	AA	AA	TT	TC	GG
Case	negative	AG	AG	AA	TT	CC	GG
Case	positive	AA	AA	TA	TT	TT	AA
Case	negative	AG	AG	TT	TT	CC	GG
Case	negative	AG	GG	TA	TT	CC	AG
Case	negative	AA	.	.	.	TT	.
Case	positive	AG	AG	TA	TT	TT	AG
Case	positive	AG	AG	TA	TT	TT	GG
Case	positive	AA	GG	TA	TT	TC	GG
Case	negative	AG	GG	TT	TT	CC	GG
Case	.	AG	AA	TT	TT	TC	AG
Case	positive	AG	GG	TT	TT	CC	AG
Case	positive	AA	AG	AA	GT	CC	GG
Case	positive	GG	AG	TA	GT	TC	GG
Case	positive	GG	AG	AA	GT	TC	GG
Case	.	AA	AG	AA	TT	TT	GG
Case	.	AG	AA	TA	TT	TC	AG
Case	positive	AA	AG	AA	TT	TC	GG
Case	positive	AA	AA	AA	TT	TC	GG
Case	positive	GG	AA	AA	TT	TC	AA
Case	.	AA	AG	AA	TT	TT	AA
Case	.	GG	AA	AA	TT	TT	AA
Case	.	AA	GG	AA	TT	TC	AG
Case	positive	GG	AA	TT	GT	TC	AG
Case	positive	AA	AG	TA	TT	TC	AG
Case	.	GG	AA	TA	TT	TT	AG
Case	positive	AG	GG	AA	TT	TC	GG
Case	negative	AG	AG	TA	TT	TC	AG
Case	positive	AG	AG	TT	GT	TT	GG
Case	negative	AG	GG	AA	TT	TC	GG
Case	positive	AA	AA	TA	TT	TC	AG
Case	negative	.	AG	TA	TT	.	GG
Case	.	AG	AA	TA	TT	TT	AG
Case	positive	AG	AA	AA	GT	TC	GG
Case	negative	.	AA	TA	TT	.	AG
Case	.	AA	AG	TA	TT	TT	AG
Case	positive	AG	AA	AA	TT	CC	AG
Case	positive	AA	AG	TT	TT	TC	GG
Case	negative	AA	AG	TA	GT	TC	AG
Case	positive	AG	AA	TT	TT	TC	AG
Case	negative	AA	AA	AA	TT	TT	AG
Case	positive	AA	AA	AA	TT	TT	GG
Case	positive	GG	AA	TA	TT	TC	GG
Case	positive	AG	AG	TA	GT	TC	GG
Case	positive	AG	AA	TA	TT	CC	AG
Case	positive	GG	AA	TA	TT	TC	GG
Case	positive	GG	AG	TA	TT	CC	AG
Case	positive	AA	AA	TA	TT	CC	GG
Case	positive	AG	AA	AA	TT	TT	GG
Case	positive	AA	AG	TA	GT	TC	GG
Case	positive	AG	AA	TA	TT	TT	GG
Case	negative	AG	GG	AA	TT	TC	AG
Case	positive	AA	AG	AA	TT	TT	GG
Case	positive	GG	AG	AA	TT	TC	GG
Case	negative	AA	AG	AA	TT	TC	AG
Case	positive	AA	AA	AA	GT	TC	GG
Case	positive	AG	AG	TA	TT	TT	GG
Case	.	AG	AG	AA	TT	TT	AG
Case	.	AG	GG	AA	TT	CC	AG
Case	positive	AG	AA	AA	TT	TC	GG
Case	positive	AA	AG	TT	TT	TC	AG
Case	positive	AA	AA	AA	GT	TC	AG
Case	positive	AG	AA	TA	GT	TT	GG
Case	positive	AA	AG	TA	TT	TT	GG
Case	positive	AA	AA	AA	GT	TC	AG
Case	negative	AG	AA	TA	TT	TC	AA
Case	positive	AG	GG	AA	TT	TT	GG
Case	negative	AG	GG	AA	GT	CC	AG
Case	negative	AG	AG	TA	GT	TT	GG
Case	positive	GG	AG	AA	TT	TT	GG
Case	.	AA	AA	AA	GT	TC	AA
Case	positive	AG	AG	AA	TT	TT	AG
Case	positive	AG	AG	TA	TT	CC	AG
Case	.	AA	AG	TT	TT	TT	AG
Case	negative	AG	AG	TT	TT	TT	GG
Case	positive	AG	AA	AA	TT	TT	AG
Case	positive	GG	AG	AA	TT	CC	GG
Case	positive	GG	AG	AA	TT	TT	GG
Case	positive	GG	AG	TA	GT	CC	GG
Case	positive	AA	AG	AA	TT	TC	AA
Case	positive	AG	GG	TA	GT	TT	GG
Case	positive	AG	AA	TA	TT	CC	AG
Case	positive	AA	AG	TA	TT	CC	AG
Case	negative	AA	AA	TT	TT	TT	AA
Case	positive	GG	AG	AA	TT	TC	GG
Case	positive	AA	AA	TA	TT	TT	GG
Case	.	GG	GG	AA	TT	CC	GG
Case	positive	AG	AA	AA	TT	CC	GG
Case	positive	AG	AA	TA	GT	CC	GG
Case	positive	AA	AA	AA	TT	TT	GG
Case	negative	AA	AA	TT	TT	TC	AA
Case	negative	AG	AA	TA	GT	TC	GG
Case	positive	AG	AA	AA	TT	TT	AG
Case	positive	AG	AG	TA	TT	TC	GG
Case	negative	GG	AA	AA	TT	TC	GG
Case	negative	AG	AG	TA	GT	TC	AG
Case	.	GG	AA	TA	TT	TC	GG
Case	negative	GG	GG	AA	GT	TC	GG
Case	.	AG	AA	AA	TT	TT	GG
Control	NA	AG	AG	AA	TT	TC	GG
Control	NA	AA	AG	TA	GT	TC	AG
Control	NA	AA	AA	AA	TT	TC	GG
Control	NA	AA	AA	TA	TT	TT	GG
Control	NA	GG	AA	TA	TT	TT	GG
Control	NA	AG	AA	TA	TT	TC	GG
Control	NA	AA	AG	TA	TT	TC	GG
Control	NA	AA	AG	TT	TT	TT	GG
Control	NA	AG	AG	AA	TT	CC	GG
Control	NA	GG	AG	AA	TT	TT	GG
Control	NA	AG	AG	AA	TT	TT	GG
Control	NA	AA	AG	TT	TT	TT	GG
Control	NA	AG	AA	AA	TT	TT	GG
Control	NA	AG	AA	TA	TT	TC	GG
Control	NA	AA	AA	AA	TT	TC	GG
Control	NA	AG	AG	AA	TT	TC	AG
Control	NA	GG	AG	TA	TT	TC	GG
Control	NA	AG	AG	AA	TT	TC	GG
Control	NA	AA	AG	TA	TT	TT	GG
Control	NA	AA	AG	TA	GT	TC	AG
Control	NA	AG	AA	AA	TT	TC	GG
Control	NA	GG	AA	AA	TT	TT	GG
Control	NA	AG	AG	AA	GT	TT	GG
Control	NA	AA	AG	AA	TT	TC	GG
Control	NA	AA	AA	AA	TT	.	GG
Control	NA	AA	AG	.	TT	TT	GG
Control	NA	AA	GG	TT	TT	CC	GG
Control	NA	AA	AG	TA	TT	CC	GG
Control	NA	AG	AA	TA	TT	TC	AG
Control	NA	AG	AG	TA	TT	TC	GG
Control	NA	AG	AA	AA	TT	TT	AG
Control	NA	AG	AA	TA	TT	TT	AG
Control	NA	AA	AG	AA	TT	TT	GG
Control	NA	AA	AA	TA	TT	TT	GG
Control	NA	AA	AA	TA	TT	TC	GG
Control	NA	AG	AG	TA	TT	TC	GG
Control	NA	GG	GG	TA	TT	CC	GG
Control	NA	AA	AA	AA	GT	.	GG
Control	NA	AA	AA	AA	TT	.	AG
Control	NA	AG	AG	AA	TT	TT	AG
Control	NA	AG	AG	TA	TT	TT	GG
Control	NA	AA	AG	TT	TT	TC	AG
Control	NA	AA	AA	.	.	CC	.
Control	NA	AA	AA	TA	GT	TC	GG
Control	NA	AA	AG	AA	TT	TC	GG
Control	NA	AA	AA	AA	TT	TC	GG
Control	NA	AG	AG	AA	TT	TT	GG
Control	NA	GG	AG	AA	TT	TT	AG
Control	NA	GG	AG	TA	TT	TT	GG
Control	NA	AA	AA	AA	TT	TC	AG
Control	NA	AG	AA	TA	GT	CC	GG
Control	NA	GG	AA	TA	TT	TC	AA
Control	NA	AA	AA	AA	TT	TT	GG
Control	NA	AA	AG	AA	TT	TC	AG
Control	NA	AG	AA	AA	TT	TT	GG
Control	NA	GG	AA	AA	TT	TT	GG
Control	NA	AA	AG	TA	TT	TC	AG
Control	NA	AA	AG	TA	TT	TC	AG
Control	NA	AA	AG	.	.	.	GG
Control	NA	AG	GG	TA	TT	TC	GG
Control	NA	GG	AA	TA	GT	TT	GG
Control	NA	AA	AG	AA	TT	CC	GG
Control	NA	AG	AA	TA	TT	TC	GG
Control	NA	AG	AA	TT	TT	TC	GG
Control	NA	AG	AG	TT	TT	CC	AG
Control	NA	AA	AA	TA	TT	TC	GG
Control	NA	AG	AG	TA	TT	TT	GG
Control	NA	AA	GG	TA	TT	TC	GG
Control	NA	AG	GG	TA	TT	TT	GG
Control	NA	AG	AG	TT	TT	CC	GG
Control	NA	AA	AG	TA	TT	TT	GG
Control	NA	AA	AA	AA	TT	TC	AA
Control	NA	GG	AG	TT	TT	CC	AG
Control	NA	AA	AG	TA	TT	TT	GG
Control	NA	GG	AA	TT	TT	TC	AG
Control	NA	AG	AA	TT	GT	TT	GG
Control	NA	AG	AG	TT	TT	TC	GG
Control	NA	AG	AA	TA	TT	TC	AG
Control	NA	AG	AA	TT	GT	TT	GG
Control	NA	AA	AA	TA	GT	TT	AA
Control	NA	AA	AG	AA	TT	TC	GG
Control	NA	AG	AA	AA	TT	TT	AG
Control	NA	AG	AG	TA	TT	TT	GG
Control	NA	GG	AA	TA	TT	TC	GG
Control	NA	AG	AA	TA	TT	TC	GG
Control	NA	AA	AA	TA	TT	TC	GG
Control	NA	AA	AA	TA	TT	TC	GG
Control	NA	GG	AA	AA	TT	CC	AG
Control	NA	AG	AA	TT	TT	TC	AG
Control	NA	GG	AA	AA	TT	TT	AG
Control	NA	GG	AA	TA	TT	TC	GG
Control	NA	GG	AA	TT	TT	CC	GG
Control	NA	AG	AG	TA	TT	CC	AG
Control	NA	AG	AA	TA	TT	CC	AA
Control	NA	AA	AA	AA	TT	TC	AG
Control	NA	AG	AG	TT	GT	TC	GG
Control	NA	AA	AA	TA	TT	TT	GG
Control	NA	AA	AG	TA	GT	TT	AG
Control	NA	AA	AA	TT	TT	TT	AG
Control	NA	AA	AA	AA	GT	TC	GG
Control	NA	AA	AG	TA	TT	TC	AG
Control	NA	GG	AG	AA	TT	CC	AG
Control	NA	AA	AG	TA	TT	TT	GG
Control	NA	AA	AG	TT	TT	TT	AG
Control	NA	AG	AA	AA	TT	CC	AG
Control	NA	AG	AA	TA	GT	TT	GG
Control	NA	AA	AA	.	TT	CC	AG
Control	NA	AG	AA	TA	TT	CC	AG
Control	NA	AG	GG	AA	TT	TT	GG
Control	NA	AA	AG	TA	TT	TT	AG
Control	NA	AG	AG	TA	TT	TC	AG
Control	NA	AG	AA	AA	TT	TC	GG
Control	NA	AG	AG	AA	TT	TC	GG
Control	NA	AG	AA	TA	TT	CC	AG
Control	NA	AA	AG	TA	TT	TC	AG
Control	NA	AG	AA	AA	TT	TC	AG
Control	NA	AA	AA	AA	TT	CC	GG
Control	NA	AG	AG	AA	TT	TT	GG
Control	NA	GG	AG	TA	GT	TC	GG
Control	NA	AG	AG	TA	TT	TC	AG
Control	NA	AG	AA	AA	TT	CC	AG
Control	NA	AA	AG	TT	TT	TT	GG
Control	NA	AA	AG	TA	TT	.	AG
Control	NA	AA	AG	TA	TT	TC	AG
Control	NA	AA	AG	TT	TT	TC	AG
Control	NA	AA	AG	AA	TT	TC	GG
Control	NA	AG	AA	TA	TT	TT	GG
Control	NA	AG	AA	TT	TT	TC	GG
Control	NA	AG	AA	TA	GT	TC	AG
Control	NA	AA	AG	TA	TT	TT	AG
Control	NA	AG	AA	TA	GT	.	GG
Control	NA	AG	AA	AA	TT	TC	GG
Control	NA	AA	GG	.	.	CC	.
Control	NA	AA	AA	AA	GT	CC	AG
Control	NA	GG	AA	AA	TT	TT	AG
Control	NA	AA	AG	TA	TT	TC	GG
Control	NA	AA	AG	TA	TT	TT	GG
Control	NA	AG	AA	TA	GT	TT	AA
Control	NA	AG	AA	AA	TT	TC	GG
Control	NA	AA	AG	AA	TT	TT	GG
Control	NA	GG	AA	AA	TT	CC	GG
Control	NA	GG	AA	TA	TT	CC	GG
Control	NA	GG	AG	TA	TT	TC	AG
Control	NA	AG	AG	TA	TT	TT	GG
Control	NA	AA	AA	AA	TT	TT	AG
Control	NA	AA	AA	TT	.	TC	GG
Control	NA	GG	AA	TT	TT	TC	GG
Control	NA	AG	AA	TA	TT	TT	GG
Control	NA	AG	GG	TT	TT	TT	GG
Control	NA	AA	AA	AA	TT	CC	GG
Control	NA	AG	AG	AA	TT	CC	GG
Control	NA	AA	.	TA	.	.	.
Control	NA	AA	AA	TA	.	.	GG
Control	NA	GG	AG	AA	GT	TT	GG
Control	NA	AG	AA	AA	TT	TT	GG
Control	NA	AA	AG	AA	TT	TC	GG
Control	NA	AG	AG	AA	TT	TC	AG
Control	NA	AA	AG	AA	TT	TC	AG
Control	NA	GG	AA	AA	TT	CC	AG
Control	NA	AG	AA	AA	TT	TC	GG
Control	NA	AG	AA	TA	TT	CC	GG
Control	NA	AA	.	.	TT	TC	.
Control	NA	AA	AA	TT	TT	.	AG
Control	NA	AG	AA	TA	TT	TT	AA
Control	NA	GG	AA	TT	TT	TT	AG
Control	NA	AG	AG	TA	TT	TC	GG
Control	NA	AG	GG	TA	TT	TC	AG
Control	NA	GG	AG	TA	TT	TC	AG
Control	NA	AG	AA	TA	TT	TT	AA
Control	NA	AA	AA	TT	TT	TT	AG
Control	NA	AG	AG	TA	TT	TC	GG
Control	NA	AG	AA	AA	TT	CC	GG
Control	NA	AG	AA	AA	TT	TC	GG
Control	NA	AA	AG	TA	TT	TT	GG
Control	NA	AG	AG	AA	TT	TC	AG
Control	NA	AG	AG	AA	TT	TC	AG
Control	NA	AG	AA	AA	TT	TC	AG
Control	NA	GG	AG	AA	TT	CC	AG
Control	NA	AA	AG	TT	TT	TT	AG
Control	NA	AG	AG	TA	TT	TC	GG
Control	NA	AA	AA	TA	TT	TC	GG
Control	NA	AA	GG	TA	TT	TC	GG
Control	NA	AG	AA	AA	TT	CC	GG
Control	NA	AG	AG	TA	TT	TC	GG
Control	NA	GG	.	.	.	TC	.
Control	NA	AG	AG	TA	TT	CC	GG
Control	NA	AA	AG	TA	TT	TC	GG
Control	NA	AG	AA	TT	GT	TC	AA
Control	NA	GG	AA	TA	TT	TC	AG
Control	NA	AG	AA	AA	TT	CC	GG
Control	NA	AA	AA	TA	TT	TC	GG
Control	NA	AA	AA	AA	TT	TT	GG
Control	NA	AG	AA	AA	TT	TC	GG
Control	NA	AA	AA	AA	TT	TC	GG
Control	NA	AA	AG	TA	GG	TC	GG
Control	NA	AG	AG	TT	TT	TC	AG
Control	NA	AG	AA	TA	TT	CC	AG
Control	NA	AG	AG	AA	TT	CC	AG
Control	NA	GG	AG	AA	TT	TC	AA
Control	NA	AA	AA	AA	GT	TC	GG
Control	NA	AG	AG	TA	TT	TC	GG
Control	NA	AG	AG	AA	TT	TC	GG
Control	NA	AG	AG	TA	TT	TT	GG
Control	NA	AA	AG	TT	TT	TC	AG
Control	NA	AG	AG	TT	TT	TC	AA
Control	NA	AG	AG	AA	TT	TC	AA
Control	NA	AA	AA	TA	TT	TT	AG
Control	NA	AA	GG	TA	TT	TC	AA
Control	NA	AA	AA	TA	GT	TC	GG
Control	NA	AA	GG	TA	TT	TC	AG
Control	NA	AG	AA	TA	TT	CC	GG
Control	NA	AA	AG	AA	TT	TC	GG
Control	NA	AG	AG	AA	TT	TT	AA
Control	NA	AA	AA	TA	TT	TC	GG
Control	NA	GG	AA	TA	TT	CC	GG
Control	NA	AG	AG	AA	GT	TT	GG
Control	NA	AG	AG	AA	TT	TC	GG
Control	NA	AG	AG	AA	TT	CC	GG
Control	NA	AA	AG	TA	TT	TC	GG
Control	NA	AA	AG	TT	TT	CC	GG
Control	NA	AA	AA	TA	GT	CC	GG
Control	NA	AA	AG	TT	TT	CC	AG
Control	NA	AA	AG	TA	GT	TC	AA
Control	NA	AA	AA	.	GT	TC	AG
Control	NA	AG	AG	AA	TT	TT	GG
Control	NA	GG	AA	TT	GT	TC	AA
Control	NA	.	AG	AA	GT	TC	GG
Control	NA	AG	AG	AA	GT	TC	AG
Control	NA	AA	AA	TA	TT	TT	GG
Control	NA	AG	AA	TT	TT	TT	AG
Control	NA	AG	AG	AA	TT	TT	GG
Control	NA	AG	AG	TA	TT	TC	GG
Control	NA	AA	AA	TA	TT	TC	GG
Control	NA	AA	AA	TA	TT	TC	GG
Control	NA	AA	AG	AA	TT	TT	GG
Control	NA	AG	AA	AA	GT	TC	GG
Control	NA	AG	AG	TT	TT	TT	GG
Control	NA	AG	AG	AA	GG	TC	AG
Control	NA	.	AG	.	.	TC	GG
Control	NA	GG	AG	AA	GT	CC	AG
Control	NA	AG	AG	TT	GT	TT	GG
Control	NA	AA	AG	TA	GT	TT	GG
Control	NA	AA	GG	TT	.	TC	GG
Control	NA	AG	AA	TT	TT	TC	GG
Control	NA	AA	AG	TA	GT	TC	GG
Control	NA	AG	AG	TA	TT	TC	AA
Control	NA	AA	AA	TT	TT	TC	AG
Control	NA	AG	AA	.	TT	TC	AG
Control	NA	AG	AA	AA	TT	TT	GG
Control	NA	AG	AG	AA	TT	TC	GG
Control	NA	AG	AG	AA	TT	TC	GG
Control	NA	AG	AA	TA	TT	CC	GG
Control	NA	GG	AG	.	TT	TC	GG
Control	NA	AG	AA	TT	TT	TC	GG
Control	NA	AG	GG	TA	TT	CC	AG
Control	NA	AA	AA	TA	TT	CC	AG
Control	NA	AA	AA	TA	TT	CC	GG
Control	NA	GG	AG	AA	TT	TC	AG
Control	NA	GG	GG	AA	TT	TC	GG
Control	NA	GG	GG	TA	TT	TT	AG
Control	NA	AA	AG	AA	TT	CC	GG
Control	NA	AA	AG	TA	.	TC	AG
Control	NA	AA	AA	TT	.	TC	AA
Control	NA	AA	AA	TT	TT	CC	AG
Control	NA	AG	AG	TT	.	CC	GG
Control	NA	AG	GG	AA	TT	TC	GG
Control	NA	AG	AA	TA	TT	TC	GG
Control	NA	AA	AG	AA	TT	TC	GG
Control	NA	AG	AG	AA	TT	TT	GG
Control	NA	.	AA	AA	.	TT	.
Control	NA	AG	AA	AA	TT	TT	GG
Control	NA	.	AG	AA	TT	TT	GG
Control	NA	AA	AA	AA	GT	TT	AG
Control	NA	AG	.	.	.	CC	.
Control	NA	GG	AG	AA	GT	TC	GG
Control	NA	AA	AA	TA	TT	TT	GG
Control	NA	GG	AA	TA	TT	TT	GG
Control	NA	AG	AG	AA	TT	TC	AG
Control	NA	AG	AA	TA	TT	TC	GG
Control	NA	AG	AA	TA	TT	CC	GG
Control	NA	AG	AA	TT	GT	TT	GG
Control	NA	AG	AG	AA	TT	CC	AG
Control	NA	AA	AA	AA	.	TC	GG
Control	NA	AA	GG	TA	GT	TT	AG
Control	NA	AG	AG	TT	TT	CC	GG
Control	NA	AG	AA	TT	TT	TC	AA
Control	NA	AA	AG	AA	TT	TC	GG
Control	NA	AG	GG	TA	TT	TT	GG
Control	NA	AA	AG	TT	.	TC	AA
Control	NA	AG	AG	TA	TT	TT	AG
Control	NA	AA	AG	TA	GT	TT	GG
Control	NA	AG	AA	TA	TT	TT	GG
Control	NA	AG	AA	TT	TT	TT	AG
Control	NA	AA	AG	AA	TT	TC	GG
Control	NA	AA	AA	TT	TT	TC	GG
Control	NA	.	GG	AA	TT	.	AG
Control	NA	AA	AA	TA	GT	TC	GG
Control	NA	AG	AG	AA	TT	TT	AG
Control	NA	AA	AG	TA	TT	TC	GG
Control	NA	AA	GG	AA	TT	TC	GG
Control	NA	AG	AG	AA	GT	CC	GG
Control	NA	AG	AA	AA	TT	CC	AG
Control	NA	AA	AG	TA	TT	TC	GG
Control	NA	GG	AA	TT	TT	TC	AG
Control	NA	GG	AG	.	TT	TC	GG
Control	NA	AA	AA	AA	TT	TC	AG
Control	NA	AA	AA	TT	TT	TC	GG
Control	NA	AA	AA	AA	TT	TC	GG
Control	NA	AG	AA	AA	TT	CC	GG
Control	NA	AA	AA	TT	GT	TT	AG
Control	NA	.	AA	TT	GT	.	AG
Control	NA	GG	AA	TA	TT	TC	AG
Control	NA	AG	AA	TT	TT	CC	AG
Control	NA	AG	AG	TA	TT	TC	AG
Control	NA	AA	AG	TA	GT	TT	AG
Control	NA	AG	AA	TA	TT	TC	AG
Control	NA	AG	AA	TA	TT	TC	AG
Control	NA	AA	AG	TA	TT	TT	GG
Control	NA	AG	AG	TA	TT	TC	GG
Control	NA	AG	AA	AA	GT	TT	AA
Control	NA	AG	AA	TA	TT	TT	GG
Control	NA	AG	AA	AA	TT	CC	GG
Control	NA	AG	GG	TT	TT	TC	AG
Control	NA	AA	AG	AA	TT	TT	AG
Control	NA	GG	AG	AA	TT	TC	GG
Control	NA	AA	AA	TA	TT	TC	GG
Control	NA	AA	AG	TT	TT	TT	GG
Control	NA	AG	AG	TA	TT	TC	GG
Control	NA	GG	AG	AA	TT	CC	AG
Control	NA	AG	AG	AA	TT	TC	GG
Control	NA	AA	.	.	.	TC	.
Control	NA	GG	AA	TA	TT	TC	GG
Control	NA	AG	AA	AA	TT	TT	GG
Control	NA	AG	AA	AA	TT	CC	AG
Control	NA	AG	AA	AA	TT	TC	AG
Control	NA	AG	AG	AA	TT	TC	AG
Control	NA	AG	AA	AA	TT	TC	AG
Control	NA	AG	AA	TA	TT	TT	GG
Control	NA	AG	AA	TA	TT	TC	GG
Control	NA	AA	AG	TA	TT	TC	GG
Control	NA	AG	AG	TA	TT	CC	GG
Control	NA	AA	AG	AA	TT	TC	GG
Control	NA	GG	AA	AA	TT	TT	GG
Control	NA	AG	AA	TA	GT	TC	GG
Control	NA	AG	AA	TA	TT	TC	AG
Control	NA	AG	AG	AA	TT	TT	GG
Control	NA	AG	AG	AA	TT	TC	GG
Control	NA	AG	AA	TT	GT	TT	GG
Control	NA	AA	AG	AA	TT	TC	GG
Control	NA	AA	AA	AA	TT	TT	GG
Control	NA	AG	AA	AA	GT	TC	AG
Control	NA	AA	AA	AA	TT	TC	AG
Control	NA	AA	AG	AA	TT	TT	GG
Control	NA	AG	AG	TT	GT	TC	AA
Control	NA	AG	AA	TA	TT	TC	AG
Control	NA	AG	AA	AA	TT	TT	GG
Control	NA	AG	AA	TT	TT	CC	AG
Control	NA	AG	AG	AA	TT	TC	AG
Control	NA	AA	AA	TA	TT	TC	AG
Control	NA	AA	AA	AA	TT	CC	GG
Control	NA	AA	AG	TA	TT	CC	AG
Control	NA	AG	AG	TA	TT	TC	GG
Control	NA	AA	AA	TA	GT	CC	AG
Control	NA	GG	GG	TT	TT	TT	GG
Control	NA	AA	AA	TA	TT	CC	GG
Control	NA	AA	AG	TA	GT	CC	GG
Control	NA	AA	AG	AA	TT	TC	GG
Control	NA	AA	AA	TA	GT	TC	GG
Control	NA	AG	AG	AA	TT	TC	GG
Control	NA	AA	AG	TA	TT	TT	AG
Control	NA	AG	AG	AA	GT	TC	GG
Control	NA	AA	AA	TT	TT	CC	GG
Control	NA	AG	AA	TA	GT	TT	AG
Control	NA	AG	AG	AA	GT	TT	AG
Control	NA	AA	AA	TA	TT	TT	AG
Control	NA	AA	AA	AA	TT	TT	GG
Control	NA	AA	AA	AA	TT	TC	GG
Control	NA	AA	AG	TA	TT	TC	GG
Control	NA	AG	AA	TA	TT	TC	AG
Control	NA	AA	AA	AA	TT	TC	AG
Control	NA	AA	AA	TA	TT	TC	GG
Control	NA	AA	AA	AA	TT	TC	AG
Control	NA	AG	AA	AA	TT	TC	GG
Control	NA	AA	AA	AA	TT	TT	GG
Control	NA	AG	AA	TA	TT	CC	GG
Control	NA	AG	AA	TT	TT	TC	AG
Control	NA	AA	AA	TA	TT	CC	AG
Control	NA	AG	AA	TA	TT	TC	GG
Control	NA	AG	AG	AA	GT	TC	AG
Control	NA	AG	GG	TA	TT	CC	AG
Control	NA	AG	GG	AA	TT	TC	GG
Control	NA	GG	AA	AA	TT	TT	GG
Control	NA	AG	AA	TA	TT	TT	GG
Control	NA	GG	AA	AA	TT	TT	AA
Control	NA	AA	GG	AA	TT	TT	GG
Control	NA	AG	AA	TA	TT	TT	GG
Control	NA	AG	AA	TT	TT	TC	GG
Control	NA	AG	AA	TT	TT	TC	GG
Control	NA	GG	AA	AA	TT	TC	AA
Control	NA	AG	AA	TA	TT	TC	AG
Control	NA	AG	GG	TA	TT	TT	GG
Control	NA	AG	AG	TT	TT	CC	GG
Control	NA	AA	AG	AA	TT	TC	GG
Control	NA	AG	GG	AA	TT	TT	GG
Control	NA	AG	AG	TA	TT	TC	GG
Control	NA	.	AG	AA	TT	.	AG
Control	NA	AA	AA	TT	TT	TT	GG
Control	NA	AA	AG	TA	TT	TC	GG
Control	NA	AA	AG	TA	TT	TC	AG
Control	NA	AG	AA	AA	GT	CC	AG
Control	NA	AA	AG	TT	TT	TC	AG
Control	NA	AA	AG	AA	TT	TT	AG
Control	NA	GG	AA	AA	TT	TC	GG
Control	NA	AG	AG	AA	TT	TT	GG
Control	NA	AA	AA	TA	TT	TT	AG
Control	NA	GG	AG	TT	GT	TT	GG
Control	NA	GG	AG	AA	TT	TT	AG
Control	NA	GG	AG	AA	GT	CC	AG
Control	NA	AG	.	.	.	TT	.
Control	NA	AG	AA	AA	GT	TT	AG
Control	NA	AA	AG	TA	TT	TC	GG
Control	NA	AG	AG	TA	TT	TC	AG
Control	NA	GG	AA	TA	GT	TC	AG
Control	NA	AA	AA	AA	TT	TC	GG
Control	NA	AA	AG	.	GT	CC	AG
Control	NA	AG	AA	TA	TT	TT	GG
Control	NA	AG	AG	TA	TT	TC	AG
Control	NA	GG	AA	TA	GT	TT	AG
Control	NA	AA	AA	TT	TT	CC	AA
Control	NA	AA	AA	TA	TT	TC	GG
Control	NA	AG	GG	AA	GG	TT	AA
Control	NA	AG	AA	TT	TT	TC	AG
Control	NA	AG	AA	TA	TT	TC	GG
Control	NA	AA	AA	TA	GT	TC	GG
Control	NA	AA	AA	TA	TT	TC	GG
Control	NA	GG	AG	TA	TT	TC	GG
Control	NA	AA	AA	AA	TT	TC	AA
Control	NA	AG	AG	TA	GT	TT	GG
Control	NA	AA	AA	TA	TT	TT	GG
Control	NA	AA	AA	AA	TT	TT	GG
Control	NA	AG	AG	AA	TT	TT	GG
Control	NA	GG	AA	AA	TT	TC	GG
Control	NA	AA	AG	TA	TT	TC	AG
Control	NA	.	GG	TT	TT	CC	AA
Control	NA	AA	AA	TA	TT	TT	AG
Control	NA	AG	GG	AA	TT	TT	AG
Control	NA	AA	AA	TA	TT	TT	AG
Control	NA	AG	AA	TA	TT	TT	GG
Control	NA	AG	AA	TA	TT	TT	GG
Control	NA	AG	AA	TA	TT	TC	AG
Control	NA	AG	AA	TA	TT	TC	GG
Control	NA	GG	AG	TT	TT	TT	GG
Control	NA	GG	AG	TA	TT	CC	GG
Control	NA	AA	AG	TT	TT	CC	AG
Control	NA	AA	AG	TT	TT	TC	AG
Control	NA	AG	AG	TT	TT	TC	AG
Control	NA	AG	GG	AA	TT	TC	AG
Control	NA	AG	AG	AA	TT	TT	GG
Control	NA	AA	AA	AA	GT	TT	GG
Control	NA	AG	AG	AA	TT	TC	GG
Control	NA	AG	AG	TA	TT	TC	GG
Control	NA	AG	AA	TA	GT	TT	AG
Control	NA	AA	AG	AA	TT	TT	GG
Control	NA	AG	GG	AA	TT	TC	GG
Control	NA	GG	AA	TA	TT	TC	AG
Control	NA	GG	AA	TA	TT	TC	GG
Control	NA	AA	AG	TA	TT	TC	AG
Control	NA	GG	AA	AA	TT	TC	GG
Control	NA	GG	AG	AA	TT	TT	GG
Control	NA	AG	AG	TT	TT	TC	GG
Control	NA	AG	AA	TT	TT	TC	AG
Control	NA	AA	AG	TA	TT	TC	GG
Control	NA	AG	AG	TA	TT	CC	AG
Control	NA	GG	AG	TA	TT	CC	GG
Control	NA	.	AG	TA	TT	.	AG
Control	NA	AG	AG	TA	TT	TC	GG
Control	NA	AG	AG	TA	TT	CC	GG
Control	NA	AA	AG	TA	TT	TC	AG
Control	NA	AG	AA	TA	TT	TT	GG
Control	NA	AA	AA	TA	TT	TC	GG
Control	NA	GG	AG	TA	TT	TC	GG
Control	NA	AA	AG	AA	GT	TT	AG
Control	NA	AA	AG	TA	TT	TC	GG
Control	NA	AG	AG	TA	TT	TC	AG
Control	NA	AA	AG	AA	GT	TT	GG
Control	NA	GG	AA	AA	TT	TT	GG
Control	NA	AA	AG	AA	TT	CC	GG
Control	NA	AA	AG	AA	TT	CC	GG
Control	NA	AG	AA	TA	TT	TT	AG
Control	NA	AA	AG	TA	GT	TC	GG
Control	NA	AA	AA	AA	TT	TC	GG
Control	NA	AA	AG	TT	TT	CC	GG
Control	NA	AG	AG	TT	TT	CC	AG
Control	NA	GG	GG	AA	TT	CC	AG
Control	NA	AG	AA	AA	TT	TT	AG
Control	NA	AG	AG	AA	TT	TC	GG
Control	NA	AA	AG	AA	TT	TC	AG
Control	NA	AG	AG	AA	TT	TC	AG
Control	NA	AG	AG	TA	TT	TC	GG
Control	NA	AA	AA	TA	TT	TC	GG
Control	NA	AG	AG	AA	TT	TC	AG
Control	NA	AA	AA	TA	TT	TC	AA
Control	NA	GG	AG	TA	TT	TC	AG
Control	NA	GG	AA	TA	TT	TC	GG
Control	NA	GG	AG	AA	TT	CC	GG
Control	NA	GG	AA	AA	TT	CC	AG
Control	NA	AG	AG	TT	TT	TC	GG
Control	NA	AG	AG	TA	TT	TT	GG
Control	NA	AA	AG	TA	TT	TC	GG
Control	NA	AA	AA	TA	TT	TC	GG
Control	NA	AA	AA	TT	TT	TT	GG
Control	NA	GG	AA	TA	TT	CC	GG
Control	NA	AG	GG	TA	TT	TT	GG
Control	NA	AG	AA	AA	TT	TC	GG
Control	NA	AA	AA	TA	TT	TT	GG
Control	NA	GG	AA	AA	TT	CC	GG
Control	NA	GG	AA	AA	TT	CC	GG
Control	NA	AG	AA	AA	TT	TC	GG
Control	NA	GG	AG	TA	TT	TT	GG
Control	NA	AG	AA	AA	TT	TT	AG
Control	NA	GG	GG	TA	TT	TT	AG
Control	NA	AG	AG	TA	TT	TC	GG
Control	NA	AG	GG	TA	TT	TT	AG
Control	NA	AA	AA	AA	TT	TC	AG
Control	NA	GG	AA	TA	GT	TC	AG
Control	NA	AA	AG	TA	GT	CC	GG
Control	NA	AG	AA	TA	TT	CC	GG
Control	NA	AG	AG	AA	TT	TT	AG
Control	NA	GG	AA	AA	TT	TT	AG
Control	NA	AA	AA	TT	TT	TC	GG
Control	NA	AA	AA	TA	TT	TC	AA
Control	NA	AG	AA	TA	TT	TC	GG
Control	NA	AG	AA	AA	GT	TC	GG
Control	NA	AG	AA	TA	TT	TT	AG
Control	NA	AA	AG	TA	TT	TT	GG
Control	NA	AA	AG	AA	TT	TC	GG
Control	NA	AG	AA	TA	TT	TT	GG
Control	NA	AA	AA	TA	TT	TC	AG
Control	NA	AG	AA	TT	TT	TT	GG
Control	NA	GG	AA	TA	TT	TT	AG
Control	NA	AA	AG	AA	TT	TC	GG
Control	NA	AA	AA	AA	TT	TC	GG
Control	NA	AA	AA	TA	TT	TC	GG
Control	NA	AA	AA	AA	TT	TT	GG
Control	NA	GG	GG	AA	TT	CC	AA
Control	NA	AG	AG	TA	TT	TC	AG
Control	NA	AG	AG	AA	TT	TT	GG
Control	NA	AG	AG	AA	GT	TC	AA
Control	NA	AG	GG	TA	TT	TT	GG
Control	NA	GG	AG	TA	TT	TC	AA
Control	NA	AG	GG	AA	TT	CC	GG
Control	NA	AA	AA	AA	TT	CC	AG
Control	NA	AG	AG	TA	TT	TC	AG
Control	NA	AA	AG	AA	TT	CC	GG
Control	NA	AG	AA	TA	TT	CC	GG
Control	NA	AG	AG	AA	TT	TC	GG
Control	NA	GG	AG	AA	GT	TT	GG
Control	NA	AA	AA	TA	TT	TC	GG
Control	NA	AA	AG	TT	TT	TC	GG
Control	NA	AG	AG	AA	TT	TT	AG
Control	NA	AG	AG	AA	TT	TT	AG
Control	NA	AG	AG	AA	TT	TC	GG
Control	NA	AA	AA	TA	TT	TT	GG
Control	NA	AG	AA	AA	TT	TC	AG
Control	NA	AG	AA	TT	TT	CC	AG
Control	NA	AA	AA	TA	TT	TC	AG
Control	NA	AG	AG	AA	TT	TT	AA
Control	NA	AA	AG	AA	TT	TC	AG
Control	NA	AG	AA	TT	TT	TC	AG
Control	NA	AA	GG	AA	TT	CC	AG
Control	NA	AG	AA	AA	TT	TT	GG
Control	NA	GG	AA	AA	TT	TC	GG
Control	NA	AA	AA	AA	TT	TT	AG
Control	NA	AG	AA	TA	TT	TC	GG
Control	NA	AG	GG	TA	TT	TC	GG
Control	NA	GG	AG	AA	TT	TT	AG
Control	NA	AA	AA	TA	TT	TC	GG
Control	NA	AG	AA	TA	TT	TC	GG
Control	NA	AA	AG	AA	GT	TT	GG
Control	NA	AG	AA	TA	GT	TT	GG
Control	NA	AG	AG	TA	TT	CC	AG
Control	NA	AA	AG	TA	TT	TT	AG
Control	NA	AA	AA	AA	TT	TC	AG
Control	NA	AA	AA	TA	TT	TC	AG
Control	NA	AA	AA	TA	TT	TT	AG
Control	NA	AA	GG	TA	TT	TT	GG
Control	NA	AG	AG	TA	TT	TT	GG
Control	NA	AG	AA	TT	TT	TT	AG
Control	NA	AA	AA	TA	TT	CC	AG
Control	NA	AG	AA	TA	TT	CC	AG
Control	NA	AG	AA	TT	TT	CC	GG
Control	NA	AA	AA	TA	TT	TT	GG
Control	NA	AG	GG	AA	TT	TC	GG
Control	NA	AA	AA	TA	TT	TT	GG
Control	NA	AG	AA	TT	TT	TC	GG
Control	NA	GG	AG	TA	TT	CC	GG
Control	NA	AA	AA	TT	TT	TC	GG
Control	NA	GG	AA	TA	TT	TC	GG
Control	NA	AG	AA	AA	TT	CC	AA
Control	NA	AG	AG	TA	TT	TT	GG
Control	NA	AG	AA	TA	TT	CC	AG
Control	NA	.	GG	TA	GT	.	GG
Control	NA	AA	AA	TA	GT	TT	GG
Control	NA	AA	AA	TA	GT	CC	GG
Control	NA	AG	AG	AA	GT	TC	GG
Control	NA	AA	AG	AA	TT	TT	GG
Control	NA	AA	AG	TA	TT	TT	AA
Control	NA	GG	AA	AA	TT	TC	AG
Control	NA	AA	AA	AA	TT	TT	AA
Control	NA	AA	AG	AA	TT	TC	GG
Control	NA	AA	AG	TA	TT	TC	AG
Control	NA	AG	GG	AA	TT	TC	AG
Control	NA	AG	AG	AA	TT	TC	GG
Control	NA	AA	AG	TA	TT	CC	AG
Control	NA	AG	GG	AA	TT	TT	AG
Control	NA	AG	AA	TA	TT	TC	AG
Control	NA	AA	AA	AA	GT	TT	GG
Control	NA	AA	AA	AA	GT	TT	GG
Control	NA	AG	AA	TA	TT	CC	AG
Control	NA	AA	GG	TT	TT	TC	AG
Control	NA	AG	AA	AA	TT	TC	GG
Control	NA	AA	AA	AA	GT	TC	AG
Control	NA	AG	AG	AA	TT	TT	GG
Control	NA	AA	AG	TA	GT	TC	AG
Control	NA	AA	AA	TA	TT	TC	AG
Control	NA	AG	AA	TA	TT	TC	AG
Control	NA	GG	AA	TA	TT	TC	AG
Control	NA	AA	AA	AA	TT	TT	GG
Control	NA	AG	AG	TA	TT	TC	AA
Control	NA	GG	AG	TA	TT	CC	AG
Control	NA	AG	AA	TA	TT	CC	AG
Control	NA	AA	AA	TA	TT	TC	AG
Control	NA	AG	AG	TA	TT	TC	GG
Control	NA	AG	AA	AA	TT	TC	AG
Control	NA	AA	AG	TA	TT	TC	GG
Control	NA	AG	AG	AA	GG	TC	GG
Control	NA	AA	AA	AA	TT	CC	GG
Control	NA	AA	AG	AA	TT	TC	GG
Control	NA	AG	AA	AA	TT	TC	GG
Control	NA	AA	AG	AA	GT	CC	GG
Control	NA	GG	AG	TA	TT	TC	GG
Control	NA	AA	AA	AA	GT	TT	GG
Control	NA	AG	AA	AA	TT	CC	GG
Control	NA	AG	AG	AA	TT	TC	AG
Control	NA	AG	AA	AA	TT	TT	GG
Control	NA	AA	AG	AA	TT	TT	GG
Control	NA	AG	AG	AA	TT	TC	GG
Control	NA	AA	AA	TT	GT	TC	AG
Control	NA	AG	GG	AA	TT	TT	AG
Control	NA	AA	AA	TT	TT	TC	GG
Control	NA	AA	AA	AA	TT	TT	GG
Control	NA	AG	AA	AA	TT	CC	GG
Control	NA	AG	AG	AA	TT	CC	AG
Control	NA	AG	AA	TA	TT	TC	GG
Control	NA	AA	AG	AA	TT	TT	GG
Control	NA	AA	AA	AA	TT	TT	AG
Control	NA	AG	AG	TA	TT	TT	GG
Control	NA	AA	AA	TT	TT	TC	AG
Control	NA	AA	AG	AA	TT	TT	AG
Control	NA	AA	GG	AA	GT	TC	GG
Control	NA	AG	AG	TT	TT	TT	GG
Control	NA	GG	AG	AA	TT	TT	GG
Control	NA	AG	AA	AA	TT	TC	AG
Control	NA	AA	AG	TA	TT	TT	GG
Control	NA	AA	AG	TA	TT	TT	AG
Control	NA	GG	AA	TA	TT	TT	GG
Control	NA	AG	AA	TA	TT	TC	GG
Control	NA	GG	AG	AA	TT	TT	AA
Control	NA	AA	AG	TT	TT	CC	GG
Control	NA	GG	GG	AA	TT	TT	AG
Control	NA	AA	AA	AA	TT	TT	GG
Control	NA	AG	AA	AA	TT	CC	AG
Control	NA	GG	AG	TT	TT	TC	AG
Control	NA	AA	GG	TA	TT	TC	AG
Control	NA	AG	AG	TT	TT	TT	GG
Control	NA	GG	AG	AA	TT	TC	GG
Control	NA	AA	AG	AA	TT	TC	AG
Control	NA	AG	AA	TT	TT	TC	GG
Control	NA	AG	AG	TT	TT	TT	GG
Control	NA	AG	AA	TA	TT	TC	GG
Control	NA	GG	AA	TT	TT	TC	AA
Control	NA	AG	AG	TA	TT	CC	GG
Control	NA	AA	GG	TA	TT	TC	AG
Control	NA	GG	AA	TA	TT	TT	GG
Control	NA	AA	AA	AA	GT	TT	AG
Control	NA	AA	AG	TA	TT	TT	AG
Control	NA	AG	AG	TA	TT	TC	GG
Control	NA	AG	AA	TA	TT	TT	AA
Control	NA	GG	AG	TA	GT	TT	AG
Control	NA	AA	AA	AA	TT	TT	AG
Control	NA	GG	AG	TA	GT	TT	AG
Control	NA	AG	AA	AA	GT	TT	GG
Control	NA	AG	AA	AA	TT	TC	AG
Control	NA	AA	GG	AA	TT	TC	AG
Control	NA	AG	AA	TT	TT	TC	GG
Control	NA	AG	AA	AA	TT	TC	GG
Control	NA	AG	AA	TA	GT	TC	GG
Control	NA	GG	AA	TA	TT	TC	GG
Control	NA	AG	AA	AA	TT	TC	GG
Control	NA	AG	AA	TA	TT	TC	GG
Control	NA	AG	AG	AA	TT	TC	GG
Control	NA	.	AA	AA	TT	.	GG
Control	NA	AG	AA	TA	TT	TT	AG
Control	NA	AG	AG	TA	TT	TC	AG
Control	NA	GG	AG	TT	GT	TC	GG
Control	NA	AG	AA	AA	TT	TC	GG
Control	NA	AA	AG	TA	TT	TC	GG
Control	NA	AA	AG	TA	TT	TC	GG
Control	NA	AA	AG	AA	TT	TC	AG
Control	NA	AA	AG	TA	TT	CC	GG
Control	NA	AG	AG	TA	TT	TC	AG
Control	NA	AA	GG	TA	TT	TT	AG
Control	NA	AG	AG	TA	TT	TT	GG
Control	NA	AA	AG	TA	TT	TC	GG
Control	NA	AA	AA	TT	GT	TT	AG
Control	NA	AA	AG	AA	TT	TC	GG
Control	NA	AG	AA	AA	TT	TC	AG
Control	NA	AG	AA	TT	TT	TC	GG
Control	NA	AA	AG	AA	TT	TT	GG
Control	NA	AA	AA	AA	TT	CC	AG
Control	NA	AG	AG	AA	GT	TT	AG
Control	NA	GG	AG	TA	TT	CC	GG
Control	NA	AA	AA	AA	TT	CC	GG
Control	NA	AG	AG	AA	TT	TT	GG
Control	NA	AG	AA	TA	TT	TT	GG
Control	NA	AG	AA	TA	TT	TC	GG
Control	NA	AA	AA	AA	TT	CC	AA
Control	NA	AA	AG	TT	TT	TC	AG
Control	NA	AA	AG	TT	TT	TT	AG
Control	NA	.	AA	AA	TT	.	GG
Control	NA	AA	AG	TT	TT	TT	GG
Control	NA	AA	AA	TA	TT	CC	AG
Control	NA	AA	AG	TT	TT	TC	AG
Control	NA	AA	AG	AA	TT	TC	AG
Control	NA	AG	AG	AA	TT	TC	AG
Control	NA	AA	AA	TA	TT	TC	AG
Control	NA	AG	AG	TA	TT	TC	AA
Control	NA	AA	AA	TT	GT	TC	AA
Control	NA	AG	AG	AA	TT	TC	GG
Control	NA	AA	AG	AA	TT	TC	AG
Control	NA	AG	AA	AA	TT	TC	GG
Control	NA	AG	AG	AA	TT	CC	GG
Control	NA	AG	AG	AA	TT	TC	AG
Control	NA	GG	AA	TA	TT	TT	AG
Control	NA	AG	AG	AA	TT	TC	GG
Control	NA	AA	AG	AA	TT	CC	GG
Control	NA	AA	AG	TT	TT	TC	GG
Control	NA	AA	GG	TA	GT	TC	GG
Control	NA	AG	AA	TA	TT	CC	AG
Control	NA	GG	AG	TA	TT	TC	GG
Control	NA	AG	AG	TT	TT	TC	AG
Control	NA	AA	GG	AA	TT	TC	GG
Control	NA	AG	AA	AA	TT	TC	GG
Control	NA	AG	AA	TT	TT	TC	GG
Control	NA	AG	AA	AA	TT	TC	GG
Control	NA	AA	AG	TA	TT	TT	AG
Control	NA	AA	AA	TT	TT	TT	GG
Control	NA	AA	AA	AA	GG	TC	GG
Control	NA	AG	AG	TA	TT	TC	AG
Control	NA	AG	AA	TA	TT	TC	GG
Control	NA	AA	AA	TT	TT	TT	AG
Control	NA	AA	AA	AA	TT	TC	GG
Control	NA	AG	AA	TT	TT	TC	AG
Control	NA	AG	AG	AA	TT	TC	AG
Control	NA	AA	AA	TA	TT	TC	AG
Control	NA	AG	AA	TA	TT	CC	GG
Control	NA	AG	AA	TA	TT	TT	AA
Control	NA	GG	AG	AA	TT	TC	GG
Control	NA	AG	AA	TT	TT	TT	GG
Control	NA	AG	AA	TA	TT	TC	GG
Control	NA	GG	AA	AA	GT	CC	AG
Control	NA	AA	AA	TA	TT	TC	GG
Control	NA	AG	AA	AA	TT	CC	AG
Control	NA	AA	AG	AA	TT	TT	GG
Control	NA	AG	AG	AA	TT	TC	GG
Control	NA	AG	GG	TA	TT	TC	GG
Control	NA	AG	AG	TA	TT	TT	AG
Control	NA	AG	AA	AA	TT	TC	GG
Control	NA	AA	GG	TA	TT	CC	GG
Control	NA	AG	AA	AA	TT	TC	GG
Control	NA	AG	AA	TT	TT	TC	GG
Control	NA	AA	AG	TA	TT	CC	GG
Control	NA	AG	AA	TA	TT	TT	AG
Control	NA	AA	AG	TA	TT	TC	GG
Control	NA	AA	AG	AA	GT	TC	GG
Control	NA	AA	AA	AA	TT	TT	GG
Control	NA	AA	GG	AA	TT	TT	GG
Control	NA	AA	AG	TA	TT	TC	AG
Control	NA	AA	AG	TA	TT	CC	AG
Control	NA	AA	AA	AA	TT	TC	GG
Control	NA	AG	AG	TA	TT	TC	GG
Control	NA	AG	AG	TA	TT	TT	GG
Control	NA	AA	AA	AA	TT	TC	AA
Control	NA	AA	AA	AA	TT	CC	GG
Control	NA	AA	GG	TT	TT	TT	AG
Control	NA	AG	AA	AA	TT	CC	GG
Control	NA	GG	AA	AA	TT	TC	GG
Control	NA	GG	AG	AA	GT	TT	AG
Control	NA	GG	AA	TA	TT	CC	AG
Control	NA	AA	AA	TT	TT	TT	AG
Control	NA	AA	GG	AA	TT	CC	AG
Control	NA	AA	AA	TA	TT	TC	AG
Control	NA	AG	AG	TA	GT	TT	GG
Control	NA	AG	AA	TA	TT	CC	GG
Control	NA	AG	AA	TA	TT	TC	GG
Control	NA	AG	AA	TA	TT	CC	AG
Control	NA	GG	AG	AA	GT	TC	AG
Control	NA	AA	AG	TA	TT	TC	GG
Control	NA	GG	AA	AA	TT	TC	GG
Control	NA	GG	AG	TT	TT	TC	GG
Control	NA	AA	AG	AA	TT	TC	GG
Control	NA	AG	AA	TA	TT	TC	GG
Control	NA	GG	AG	TA	TT	CC	GG
Control	NA	AG	AG	AA	TT	TC	GG
Control	NA	AA	GG	TA	TT	TC	AG
Control	NA	AG	AG	AA	TT	TT	AG
Control	NA	AA	AG	AA	GT	CC	GG
Control	NA	AG	AG	TA	TT	TC	AG
Control	NA	AA	AG	TT	TT	TC	GG
Control	NA	AA	AA	AA	TT	CC	AG
Control	NA	AA	AA	TA	TT	TC	GG
Control	NA	AA	AA	TA	TT	TC	GG
Control	NA	AG	AA	TA	TT	TT	GG
Control	NA	GG	AA	TA	TT	CC	AG
Control	NA	AA	AG	TA	TT	TC	GG
Control	NA	AA	AA	TA	TT	TT	AG
Control	NA	AA	GG	AA	TT	TT	AG
Control	NA	GG	AG	AA	TT	CC	AG
Control	NA	AA	AA	AA	TT	TT	GG
Control	NA	AA	GG	TA	TT	TC	AA
Control	NA	AA	AA	AA	TT	CC	GG
Control	NA	AG	AA	TA	GT	TC	GG
Control	NA	GG	AA	TA	TT	TC	AG
Control	NA	AA	AA	TT	TT	CC	AG
Control	NA	AA	AA	TA	GT	CC	GG
Control	NA	AG	AA	TT	TT	TC	GG
Control	NA	AG	AA	TA	TT	TT	GG
Control	NA	AG	AG	TA	GT	CC	AG
Control	NA	AA	AA	TA	TT	TC	GG
Control	NA	AA	AA	AA	TT	TT	AG
Control	NA	AA	AA	AA	TT	TT	GG
Control	NA	AA	AG	TT	TT	TC	AA
Control	NA	AG	AA	AA	TT	CC	AG
Control	NA	AA	AA	TA	TT	TT	AG
Control	NA	AG	GG	AA	TT	TC	AG
Control	NA	AG	AA	TA	TT	CC	GG
Control	NA	AG	AA	TT	TT	TT	AG
Control	NA	AA	AA	AA	TT	TC	AG
Control	NA	AG	AA	TA	TT	TT	GG
Control	NA	AG	AA	TA	TT	CC	AG
Control	NA	AG	AG	TA	TT	TC	AG
Control	NA	AA	AA	TA	GT	TT	GG
Control	NA	AG	GG	AA	TT	CC	GG
Control	NA	AA	AA	TA	TT	TC	AG
Control	NA	AA	AG	AA	TT	TC	GG
Control	NA	.	AA	TA	TT	.	AA
Control	NA	GG	AG	TA	TT	TT	GG
Control	NA	GG	GG	AA	TT	TC	GG
Control	NA	AG	AA	AA	TT	TC	AG
Control	NA	AG	AG	TT	TT	TT	GG
Control	NA	AG	AA	TA	TT	TC	AA
Control	NA	AG	AA	TA	TT	CC	AG
Control	NA	AA	AG	AA	TT	TT	AG
Control	NA	AG	GG	TT	GT	TC	GG
Control	NA	AG	AA	AA	TT	CC	GG
Control	NA	AG	AA	AA	TT	CC	AG
Control	NA	AG	AA	AA	TT	CC	GG
Control	NA	GG	AA	TA	TT	TT	AA
Control	NA	AG	AA	TA	GT	TT	AG
Control	NA	AA	AG	AA	TT	TT	AG
Control	NA	GG	GG	TA	TT	TC	AG
Control	NA	AG	AA	AA	TT	TT	GG
Control	NA	AA	AA	AA	TT	TC	GG
Control	NA	AG	GG	TA	TT	TC	AG
Control	NA	AA	AA	TA	TT	TC	GG
Control	NA	AG	AA	AA	GT	TC	AG
Control	NA	AG	.	.	.	TT	.
Control	NA	AA	AG	AA	GT	TC	GG
Control	NA	AA	GG	TA	TT	TC	GG
Control	NA	AG	AG	AA	TT	TC	GG
Control	NA	AG	AG	TA	GT	TC	GG
Control	NA	AA	AA	TA	TT	CC	AG
Control	NA	AG	AA	TA	TT	TT	AG
Control	NA	AG	AA	AA	TT	TT	AG
Control	NA	AG	AA	TA	TT	TT	AG
Control	NA	AG	AA	AA	TT	TC	AG
Control	NA	AA	AA	AA	TT	TC	GG
Control	NA	AA	AA	AA	GT	TT	GG
Control	NA	AA	AA	.	TT	TT	GG
Control	NA	.	AG	TA	TT	.	AA
Control	NA	AG	AG	AA	TT	TT	GG
Control	NA	GG	AG	AA	GT	TC	AG
Control	NA	AA	AA	TT	TT	TC	GG
Control	NA	AA	AA	TA	TT	CC	AA
Control	NA	AA	AG	TT	TT	TC	AG
Control	NA	AA	GG	AA	TT	TC	GG
Control	NA	AA	GG	TA	TT	CC	AG
Control	NA	AA	AA	AA	GT	TT	GG
Control	NA	AA	AA	TT	TT	TC	GG
Control	NA	AA	AG	TA	TT	TT	GG
Control	NA	AA	AA	AA	GT	TC	AG
Control	NA	AG	AG	TT	TT	TC	AG
Control	NA	AA	AG	TT	TT	TC	GG
Control	NA	AG	AA	TA	TT	CC	AG
Control	NA	AG	AG	TA	GT	TC	AG
Control	NA	AG	AA	TA	TT	CC	AG
Control	NA	AA	AG	TT	TT	TC	AG
Control	NA	AG	AG	AA	GT	TC	AG
Control	NA	GG	AA	TA	TT	TT	AG
Control	NA	AG	AA	TA	TT	TC	GG
Control	NA	AA	AA	TA	TT	TC	GG
Control	NA	GG	AA	AA	TT	TT	AG
Control	NA	GG	AG	AA	TT	TC	GG
Control	NA	.	AG	TA	TT	.	GG
Control	NA	GG	AG	TT	TT	TC	AA
Control	NA	AG	AG	AA	TT	TC	GG
Control	NA	GG	AA	TA	TT	TC	AG
Control	NA	AG	AA	AA	TT	TT	AG
Control	NA	GG	AG	TA	TT	TC	AG
Control	NA	AG	AG	AA	TT	CC	AG
Control	NA	AG	AG	TT	TT	TT	AG
Control	NA	AG	AA	TA	TT	CC	AG
Control	NA	AA	AG	AA	TT	CC	GG
Control	NA	AA	AG	TA	TT	TC	AA
Control	NA	AG	AA	TT	TT	TT	GG
Control	NA	GG	AA	TA	GT	CC	GG
Control	NA	AA	AA	TA	TT	TT	GG
Control	NA	AA	AA	TA	GT	TT	AG
Control	NA	GG	AA	AA	TT	CC	GG
Control	NA	AG	AG	AA	TT	TT	GG
Control	NA	AA	AG	AA	TT	TC	GG
Control	NA	AA	AG	TA	TT	TT	GG
Control	NA	GG	AA	AA	TT	TC	AG
Control	NA	GG	AA	TT	GG	CC	GG
Control	NA	GG	AG	AA	TT	CC	AG
Control	NA	AG	AG	TA	TT	TC	GG
Control	NA	AA	AA	TA	TT	TC	GG
Control	NA	GG	AA	TT	TT	CC	AG
Control	NA	AG	AG	AA	TT	CC	GG
Control	NA	AG	AA	TA	TT	TC	GG
Control	NA	AG	AG	TA	GT	TC	GG
Control	NA	GG	AA	TT	TT	TC	GG
Control	NA	AA	AA	TA	TT	TC	GG
Control	NA	GG	AA	TA	TT	TC	GG
Control	NA	AG	AG	TA	TT	TC	GG
Control	NA	AA	AA	AA	TT	TC	GG
Control	NA	GG	AA	TA	TT	TC	GG
Control	NA	AA	AG	TA	TT	TT	AG
Control	NA	.	AG	TA	TT	.	AG
Control	NA	AA	AA	TT	TT	TT	AG
Control	NA	GG	AA	AA	TT	CC	GG
Control	NA	AG	AG	TA	TT	TC	GG
Control	NA	AG	AG	TA	TT	TT	GG
Control	NA	AG	GG	TT	TT	CC	AG
Control	NA	AA	AG	TA	TT	TC	GG
Control	NA	AG	AG	TA	TT	TT	GG
Control	NA	AA	AA	AA	TT	TC	GG
Control	NA	AG	AA	TA	TT	TC	GG
Control	NA	AA	AA	TA	TT	CC	GG
Control	NA	AG	AG	AA	TT	CC	GG
Control	NA	AA	AG	TA	TT	TC	GG
Control	NA	AG	AA	TA	TT	TT	GG
Control	NA	AG	AG	.	TT	CC	GG
Control	NA	AG	AA	AA	GT	TC	AG
Control	NA	GG	AG	TA	TT	TC	GG
Control	NA	AG	AG	TA	TT	CC	AG
Control	NA	AA	GG	AA	TT	TC	AG
Control	NA	AG	AA	TA	TT	TT	AA
Control	NA	GG	AA	AA	TT	TC	GG
Control	NA	AA	AG	TA	TT	TT	GG
Control	NA	AA	AG	TA	TT	TC	GG
Control	NA	AG	AA	AA	TT	TC	AA
Control	NA	AG	AA	TA	TT	TT	GG
Control	NA	AG	GG	TA	TT	TT	AA
Control	NA	AG	GG	AA	TT	CC	AA
Control	NA	AG	AG	AA	TT	TC	GG
[truncated: 48 more rows]
